1 **Title:** Cerebellar associative learning underlies skilled reach adaptation

2

3 **Authors:** Dylan J. Calame, Matthew I. Becker, Abigail L. Person

4

5 **Abstract:**

6 Cerebellar output has been shown to enhance movement precision by scaling the decelerative phase of  
7 reaching movements in mice. We hypothesized that during reach, initial kinematics cue late-phase  
8 adjustments through cerebellar associative learning. We identify a population-level response in mouse  
9 PCs that scales inversely with reach velocity, suggesting a candidate mechanism for anticipatory control  
10 to target limb endpoint. We next interrogate how such a response is generated by combining high-density  
11 neural recordings with closed-loop optogenetic stimulation of cerebellar mossy fiber afferents originating  
12 in the pontine nuclei during reach, using perturbation schedules reminiscent of classic adaptation  
13 paradigms. We found that reach kinematics and PC electrophysiology adapt to position-locked mossy  
14 fiber perturbations and exhibit aftereffects when stimulation is removed. Surprisingly, we observed partial  
15 adaptation to position-randomized stimulation schedules but no opposing aftereffect. A model that  
16 recapitulated these findings provided novel insight into how the cerebellum deciphers cause-and-effect  
17 relationships to adapt.

18

19

20

21

22

23

24

25

26

27

28

29

30

31

32

33

34

## 35 **Introduction:**

36 In humans and animals with altered cerebellar function, movement is disorganized, causing hallmark  
37 symptoms of endpoint dysmetria<sup>1,2</sup> and impaired abilities to adapt movements in the face of novel  
38 conditions<sup>3-7</sup>. These observations lend to the idea that the cerebellum acts as a feedforward controller  
39 that learns anticipatory control<sup>8-10</sup> making movements fast, smooth, and accurate<sup>11,12</sup>.

40 Exploring these learned anticipatory signals, researchers have focused on two dominant paradigms:  
41 associative learning and motor adaptation. In associative delay eyeblink conditioning, a neutral cue  
42 predicts an aversive corneal air puff through repeated pairing. Over many trials, the subject learns to  
43 anticipate the air puff with a well-timed eyeblink. Importantly, the neutral cue (the conditioned stimulus)  
44 can be fully replaced by stimulation of cerebellar mossy fibers<sup>13,14</sup> and the air puff (the unconditioned  
45 stimulus) can be fully replaced by stimulation of climbing fibers<sup>14</sup> – the teaching signals that drive complex  
46 spike (Cspk) mediated plasticity at the Purkinje cell (PC) dendrites<sup>15,16</sup>. PCs learn to pause at the  
47 predicted time of the unconditioned stimulus causing bursts of activity in cerebellar nucleus neurons that  
48 drive eyeblink closure (the conditioned response). Related associative learning paradigms that pair  
49 neutral cues with cerebellar-driven limb movements extend these principles to multiple effectors<sup>17-19</sup>.  
50 Associative learning has been thematically linked to motor adaptation of simple movements, such as in  
51 VOR adaptation, where sensory signals such as vestibular information conveyed via mossy fibers may  
52 act as conditioned stimuli used as predictive cues for novel cerebellar output over learning<sup>20-22</sup>.  
53 Perturbations that result in movement error and associated Cspks lead to adaptation of PC simple spike  
54 tuning with correlated changes in behavior<sup>23-25</sup>. This iterative tuning of simple spikes is interpreted as a  
55 remapping of mossy fiber inputs conveying sensorimotor information onto novel cerebellar outputs<sup>25</sup>.

56 Yet, with more complex motor skills such as reach, both cerebral cortex and cerebellum are proposed  
57 as sites of learning<sup>26-28</sup>, with long-range loops likely functioning synergistically<sup>29</sup>. Thus, learning-related  
58 changes in cerebellum could either be inherited from cortical plasticity, generated by cerebellar plasticity,  
59 or both<sup>30</sup>. Notably, acute disruption of either cortical input to the cerebellum or output from the cerebellum  
60 impairs skilled reach kinematics<sup>2,31,32</sup>, indicating that cerebellar learning may play an important role in  
61 regulating the execution of skilled movements. Indeed, in well-coordinated reaches, early kinematic  
62 features like peak reach velocity covary with subsequent limb deceleration, which is causally scaled by  
63 graded cerebellar nuclear activity<sup>2,33</sup>. We hypothesize that cerebellar output during reach is  
64 mechanistically akin to a conditioned response, such that decelerative output is cued by predictive mossy  
65 fiber activity that encodes within-movement kinematic features, thereby reducing error.

66 Here, we performed experiments designed to link the cerebellum's role in associative learning with its  
67 generation of anticipatory control of reaching movements. We superimposed a variant of associative  
68 learning onto a skilled reach task through repeated optogenetic manipulation of mossy fiber activity in

69 closed loop with reach, triggered at a consistent kinematic landmark. In addition to monitoring the  
70 kinematic effect of stimulation over trials, we also measured changes in PC response to stimulation with  
71 adaptation. To test reliance of temporal specificity on learning, we randomized the position of stimulation.  
72 A cerebellar model of timed adaptation within a movement recapitulated our key experimental findings  
73 and gives mechanistic insight into the circuit properties underlying cerebellar reach adaptation. Together,  
74 these experiments unify the frameworks of cerebellar associative learning and motor adaptation in skilled  
75 movements, an important step in understanding mechanisms of motor learning.

76

## 77 **Results:**

### 78 **A pause-based PC population code tuned to reach velocity**

79 Neurons in the anterior interposed nucleus fire proportional to reach velocity and causally scale limb  
80 deceleration, such that the limb lands on target despite initial kinematic variability<sup>2,33</sup>, consistent with the  
81 cerebellum implementing anticipatory control. To determine whether upstream PCs may drive these  
82 decelerative bursts in the cerebellar nuclei, we combined kinematic and electrophysiological recordings  
83 in mice engaged in a skilled head-fixed reach task. After mice were proficient at the task, we recorded  
84 reach kinematics with high-speed cameras via an IR-reflective marker affixed to the mouse's hand (Fig.  
85 1a, Fig. S1). Acute recordings in cerebellar cortex were made simultaneously, using either single  
86 electrodes or Neuropixel probes (Fig. 1a, Video S1). Recordings were targeted to a cerebellar cortical  
87 site situated between Lob 4/5 and Simplex known to influence forelimb movements in mice<sup>17</sup>. We found  
88 that activity in PCs was highly modulated around the time of the reach across cells and sessions (Fig  
89 1c,f, Fig. S3b), often preceding reach onset and following reach termination by 100s of ms.

90 To test the prediction that decelerative signals in the cerebellar nuclei derive from Purkinje neuron  
91 activity patterns during reach, we first sought to understand what individual PCs encode. We used least  
92 absolute shrinkage and selection operator (LASSO) regression to model PC simple spike firing rate  
93 using limb kinematics on a trial-by-trial basis, with a ten-fold cross validation step to avoid over-fitting<sup>34</sup>  
94 (see Methods). On average, kinematics of the limb alone could explain  $15.6 \pm 1.7$  % (mean  $\pm$  SEM) of  
95 the variance in simple spike firing rate on individual trials, although trial-averaged data was a much  
96 closer fit ( $59.1 \pm 3.6$  %, Fig. 1c, d) consistent with other studies of PC simple spike tuning to limb  
97 movements in primates<sup>35-39</sup>. Kinematic encoding was not a result of generic movement-related  
98 modulation, but was specific to the kinematics of individual reaches as demonstrated by a reach shuffled  
99 control that reassigned reaches with PC firing recorded during separate reaches, and a spike shuffled  
100 control where simple spike times on each trial were time shuffled and regressed against kinematics. In  
101 both cases, regression performance on the empirical data was significantly higher than the shuffled  
102 controls indicating that simple spike firing rates encode reach kinematics on a reach-by-reach basis (Fig.

103 1d;  $n = 46$  cells; empirical vs. reach shuffle:  $p = 4.21 \times 10^{-11}$ ; empirical vs spike shuffle:  $p = 2.80 \times 10^{-14}$ ,  
104 Wilcoxon signed rank test). The regression model performance did not change across the spatial  
105 trajectory of the movement, suggesting kinematic encoding is continuous in individual cells (Fig. 1e). To  
106 assess which kinematic variables in the regression model were the most important in modeling simple  
107 spike firing rate, we repeated the regression with each variable independently time shuffled and  
108 measured the change in variance explained relative to the complete model<sup>40</sup> (Fig. S3d). Positional terms  
109 -- outward, upward, and lateral – accounted for approximately 10% of the explained variance of the  
110 complete model, with each of the remaining 20 variables accounting for  $< 5\%$ , although there was a  
111 wide variety in the relative importance of different kinematic variables across cells.

112 As has been noted previously, PCs tend to show complex patterns that predominate as positive or  
113 negative spike rate modulations<sup>41,42</sup>. Of 46 recorded cells, 22 displayed increases in activity during the  
114 reach epoch (bursters) and 24 showed a decrease (pausers) (Fig. 1f). When grouped as bursters and  
115 pauses, both populations showed a deeper modulation during reaches that extended farther in the  
116 outward direction than closer reaches (Fig. 1g). Binning the endpoint position of reaches across sessions  
117 relative to the median for each session showed that the modulation in firing rate during outreach linearly  
118 increased with the distance of reaches for bursters and pausers (Fig. 1h; Bursters:  $n = 22$  cells, 1051  
119 reaches;  $R^2 = 0.40$ , slope = 25.2 with 95% CI [6.7, 43.6],  $p = 0.011$ ; Pausers:  $n = 24$  cells, 1255 reaches;  
120  $R^2 = 0.75$ , slope = -34.5 with 95% CI [-46.4, -22.6],  $p = 2.9 \times 10^{-5}$ ). The population activity in bursters  
121 and pausers was nearly equivalent, aside from a notch in the burster population, raising the question of  
122 how these diverging patterns may contribute to a coordinated control policy – i.e. a mapping of input to  
123 output that achieves a goal.

124 Populations of  $\sim 40$  PCs converge onto single nuclear cells<sup>43</sup>. In the oculomotor vermis – where  
125 bursting and pausing profiles of PCs strongly resemble the patterns we saw during reach – grouping  
126 PCs into populations across bursting and pausing classes revealed much stronger kinematic  
127 relationships with saccades<sup>41,44</sup>. Speculating that independent PCs firing patterns might have combined  
128 population activity inverse of decelerative nuclear bursts, we next grouped all PCs across all animals  
129 and looked at average activity for reaches binned by outward velocity. Strikingly, the broad onset of  
130 activity seen in individual Purkinje cells vanished at the population level. Rather, there were sharp drops  
131 in net activity during the reach epoch that scaled with the velocity of outreach (Fig. 1i). Quantifying the  
132 simple spike firing rate during this pause (see Methods) showed a strong negative relationship with  
133 outreach velocity (Fig. 1j;  $n = 46$  cells, 2077 reaches;  $R^2 = 0.83$ , slope = -2.19 with 95% CI [-2.67, -1.71],  
134  $p = 1.0 \times 10^{-8}$ ). The timing of this pause coincided with the time of peak outward acceleration during  
135 outreach, just before the transition to the decelerative phase of reach (Fig. 1k).

136 Summarizing, we found that individual PCs are privately tuned to specific kinematic features of reach  
137 but weakly related to previously observed patterns of firing in the cerebellar nuclei. Yet, at the population  
138 level, PC activity shows scaled drops in activity shortly before deceleration, consistent with a disinhibitory  
139 mechanism driving decelerative bursts in nuclear cells. We hypothesize that these pauses may be  
140 mechanistically akin to conditioned responses seen in delay eyeblink conditioning – learned pauses that  
141 produce anticipatory movements in response to predictive cues. Both the precise timing and scaling of  
142 the pausing population activity observed here are consistent with learned cerebellar responses linked  
143 to motor and sensory contingencies to control movement. As such, this behavior offers a unique  
144 opportunity to test theories relating motor adaptation to associative learning in service of skilled  
145 movement<sup>24,45–47</sup>.

146

### 147 **Cspks signal movement onset and reach outcome**

148 To probe mechanisms that might shape cerebellar cortex scaling of output as a function of kinematics,  
149 we first identified cerebellar recordings with Cspks, the drivers of learning in PCs. In 14 of 46 recorded  
150 cells, Cspks could be sorted across the experiment (see Methods). Within these cells, Cspk probability  
151 increased dramatically shortly before movement onset, consistent with reports of synchronized Cspk  
152 activity occurring at movement initiation<sup>48–50</sup>, then remained elevated during and after reach (Fig. 2a).  
153 We analyzed the 13 cells that displayed Cspks during or shortly after reach endpoint (reach onset to  
154 250 ms after limb reversal) and found that in 5 of 13 cells, trials with Cspks had significantly different  
155 endpoint positions in the outward and lateral directions (Fig. 2b;  $p < 0.05$ , paired t-test). The remaining  
156 8 cells showed no discernable tuning of Cspks to position. Additionally, trials with Cspks had significantly  
157 elevated simple spike rates during outreach compared to non-Cspk trials (Fig. 2c;  $p = 0.0199$ ,  $n = 13$   
158 cells; paired t-test). Thus, Cspks are responsive to movement features and suggest they could act as a  
159 homeostatic check on movements where simple spike rate is elevated<sup>23,51–54</sup>. These results imply that  
160 PC simple spike rate patterns during reach are likely modified by behavior-specific Cspk activity.

161

### 162 **Repeated closed-loop optogenetic perturbation of cerebellar inputs during reach causes** 163 **hallmark characteristics of sensorimotor adaptation**

164 Next, we sought to probe how cerebellar inputs shape movement kinematics and how erroneous PC  
165 simple spike activity alters tuning to these inputs. Previous work has shown that stimulation of pontine  
166 afferents to the cerebellum perturbs reaching movements in mice<sup>32</sup>. This effect is interpretable as  
167 corrupted cortical information entering the cerebellum which initially drives an erroneous cerebellar  
168 control policy and acute kinematic effects. If cerebellar associative learning underlies the formation of  
169 an anticipatory control policy, a number of predictions emerge: pontocerebellar mossy fiber stimulation

170 that drives errant reaching will, when repeated over many reaches, lead to adaptation of PC responsivity.  
171 Removing the perturbation should lead to aftereffects due to accumulated learning of new contingencies.  
172 Finally, adaptation and aftereffects will be dependent upon the temporal context of the perturbation  
173 within the movement, where learning only accumulates when perturbations are temporally locked to the  
174 execution of the movement.

175 To drive erroneous activity in PCs during reaching movements, we injected AAV-expressing hSyn-  
176 ChR2 into the pontine nuclei in mice, a major hub relaying motor commands from motor cortex to the  
177 cerebellum<sup>32,55-59</sup> (Fig. 3, Fig. S4a). Recordings of PCs showed that optogenetic stimulation of mossy  
178 fiber afferents in the cerebellar cortex drove both increases and decreases in simple spike firing rates  
179 (Fig. S4b; 15/34 cells, 9 increase, 6 decrease;  $p < 0.05$ , paired t-test). This diverging stimulation effect is  
180 likely due to network properties in the cerebellar input layers leading to either net excitatory or inhibitory  
181 drive onto PCs<sup>32,60</sup>. Interestingly, cells with sorted Cspks (see Methods) showed an increase in Cspk  
182 rate in response to mossy fiber stimulation (Fig. S4c;  $n = 19$  cells;  $p = 0.026$ , paired t-test), consistent  
183 with previous findings during electrical mossy fiber stimulation<sup>61</sup>. Cspks time-locked to mossy fiber  
184 stimulation suggest that optogenetically-driven simple spikes may engage plasticity mechanisms to  
185 respond to perturbation.

186 To assess whether repeated closed-loop stimulation could engage cerebellar learning mechanisms  
187 to produce sensorimotor adaptation, optical fibers were implanted in cerebellar cortex at the interface  
188 between Lobule Simplex and Lobules 4/5 (Fig. S5). Experiments were structured in a block format where  
189 animals reached unperturbed in a baseline block, followed by a stimulation block where closed-loop  
190 stimulation of pontocerebellar axons (50-ms train) was delivered on every reach when the hand passed  
191 a 1-cm threshold in the outward direction, and finally a washout block where stimulation was removed  
192 to assess any aftereffects of learning. Each block was roughly 15-30 reaches long determined by each  
193 individual animal's endurance in the task (Fig. 3a; baseline:  $23.1 \pm 6.24$  reaches; stimulation:  $22.4 \pm 5.77$   
194 reaches; washout:  $20.56 \pm 6.65$  reaches; mean  $\pm$  SD;  $n = 5$  animals, 104 sessions). Early in the  
195 stimulation block, we found that stimulation caused acute changes in reach kinematics: in 4/5 animals it  
196 caused hypermetric reaches in outward position and in 1 animal it caused hypometric reaches (Fig. 3b-  
197 c, Fig. S6a examples 1 and 2). To assess the relative change in hand position over the stimulation block,  
198 we measured the magnitude of the stimulation effect over the block, defining the initial direction of the  
199 stimulation effect on hand position as positive and the opposing direction as negative. We found that the  
200 magnitude of the stimulation effect decreased over the stimulation block. When the stimulation was  
201 removed, early in the washout block reaches deviated in the direction opposite the initial stimulation  
202 direction, before eventually correcting back to baseline at the end of the washout block (Fig 3d,e;  $n = 5$   
203 animals, 104 sessions; end baseline to early stimulation:  $p = 0.012$ , early stimulation to middle



204 stimulation:  $p = 1.27 \times 10^{-3}$ , end baseline to early washout:  $p = 0.014$ , late stimulation to early washout:  
205  $p = 0.043$ , early washout to late washout:  $p = 6.25 \times 10^{-3}$ ; paired t-test). The magnitude of the initial  
206 stimulation effect predicted the magnitude of the initial washout aftereffect across animals (Fig. 3f,  $R^2 =$   
207  $0.820$ , slope =  $-0.608$  with 95% CI  $[-1.13, -0.0853]$ ,  $p = 0.0342$ ); however, hypometric effects were  
208 generally larger than hypermetric effects (both during stimulation and washout), possibly due to  
209 biomechanical constraints of the limb and reaching apparatus imposing a ceiling effect on hypermetric  
210 movements. Interestingly, the aftereffect did not manifest until the time that stimulation would have been  
211 delivered during outreach (Fig. 3c, Fig. S6d). In control experiments using red light (635 nm) we  
212 observed no kinematic deviations or adaptation profiles as seen with blue-light stimulation (Fig. S6e).  
213 Further, blue-light stimulation at rest produced negligible movements (Fig. S6f;  $n = 4$  animals, 21  
214 sessions; maximum outward velocity during stimulation:  $0.26$  cm/s).

215 To summarize, we have shown that animals adapt to a precisely timed internal perturbation of  
216 pontocerebellar mossy fibers and this learning is reflected in opposing aftereffects when the perturbation  
217 is removed. Adaptation was temporally precise, with changes in limb kinematics early in the washout  
218 block timed to the predicted point of perturbation.

219

## 220 **PC recordings show electrophysiological correlates of adaptation at the time of perturbation**

221 To investigate cellular correlates of learning in PCs during behavioral adaptation to this circuit-level  
222 perturbation, we performed stimulation experiments while recording near the optical fiber with a  
223 Neuropixel probe. To assure that any firing rate changes were not attributable to unstable cell isolation  
224 across the experiment, we assessed the stability of every PC using two metrics: a correlation of spike  
225 template waveforms and the displacement of units along the electrode in the baseline and washout  
226 blocks (Fig. S7, see Methods). 126 of 231 recorded cells were stable across the experiment, 85 of which  
227 were modulated with reach. To assess optogenetic stimulus responsivity in these neurons, we compared  
228 simple spike firing rates between baseline and stimulated reaches within the 50-ms stimulation epoch.  
229 Consistent with mossy fiber stimulation at rest, we observed a diverging effect pattern with stimulation  
230 during reach: 19 cells showed significant increases in simple spike firing and 10 cells showed decreases  
231 (Fig. 4a,b,  $p < 0.05$ , paired t-test). Grouping cells by the initial stimulation effect (increase or decrease)  
232 and analyzing simple spike firing rate differences from the last 5 baseline reaches revealed patterns of  
233 perturbation and adaptation consistent with kinematic data. The depth of modulation to stimulation was  
234 greatest during the first stimulated trial, then progressively restored to baseline levels across the  
235 stimulation block, a pattern which held for both stimulation-increase and -decrease cells (Fig. 4c,d). We  
236 performed statistical analysis with a sliding window and observed significant differences appearing at  
237 the timepoint of stimulation early in the block. By contrast, in later trials, no significant changes in firing

238 rate were evident relative to baseline (Fig. 4c,d; Stimulation-increase cells:  $n = 19$  cells; first stim:  $p =$   
239  $3.81 \times 10^{-6}$ , first 5 stim:  $p = 9.45 \times 10^{-3}$ , middle 5 stim:  $p = 0.08$ , last 5 stim:  $p = 0.21$ ; Stimulation-decrease  
240 cells:  $n = 10$  cells; first stim:  $p = 1.95 \times 10^{-3}$ , first 5 stim:  $p = 9.77 \times 10^{-3}$ , middle 5 stim:  $p = 0.32$ , last 5  
241 stim:  $p = 0.49$ ; one sample Wilcoxon test).

242 To determine the electrophysiological basis for aftereffects in the behavior, we analyzed cells that  
243 had significant differences between baseline and the washout block in the stimulation window (Fig.  
244 S8a,b). While cells with a stimulation effect and adaptation profile had mixed responses during washout,  
245 we identified a population that decreased during the stimulation block, then increased back to baseline  
246 during washout (Fig. 4e). Like stimulation responsive cells, significant differences were timed to the  
247 stimulation window, and faded over the course of the washout block ( $n = 25$  cells; first wash:  $p = 5.96 \times$   
248  $10^{-8}$ , first 5 wash:  $p = 0.011$ , middle 5 wash:  $p = 0.43$ , last 5 wash:  $p = 0.73$ ; one sample Wilcoxon test).  
249 Interestingly, some of these aftereffect cells showed no acute response to the optogenetic stimulus,  
250 indicating that adaptation may be distributed across more PCs than receive erroneous inputs (Fig. 4e),  
251 explored in a model below.

252

### 253 **Dissociation of adaptation and aftereffects with a randomized perturbation schedule**

254 In both behavioral and electrophysiological data, we have shown that adaptation is temporally specific.  
255 We hypothesized that the temporal specificity of perturbation within the reach produced a fixed  
256 association between active inputs and error, facilitating adaptation. We therefore predicted that by  
257 presenting spatially inconsistent stimuli trial to trial, mice would exhibit little adaptation to stimulation. To  
258 test this, we repeated block-stimulation experiments, but rather than stimulating when the hand passed  
259 the 1-cm outward plane, we stimulated at a pseudorandomized position in the outward direction  
260 uniformly distributed between 0.3 and 1.8 cm (Fig 5a,b). To assess the effect of stimulation at different  
261 points in the reach, we aligned reaches to the time of stimulation and measured the difference in position  
262 compared to aligned baseline block reaches. Baseline subtracted reach profiles showed a characteristic  
263 change in outward position aligned to the time of stimulation, similar to results in fixed-position  
264 stimulation experiments. Interestingly, even though perturbation positions were distributed across the  
265 stimulation block, we found that animals still exhibited adaptation to the stimulation early in the  
266 stimulation block, but this adaptation plateaued to intermediate levels between middle and late block  
267 epochs (Fig. 5c,d;  $n = 5$  animals, 60 sessions; Early stim to mid stim:  $p = 0.037$ , paired t-test). To assess  
268 the presence of aftereffects, we analyzed the positional differences between baseline and washout  
269 reaches near the mean of the distribution of stimulus thresholds (50-100 ms after crossing the 1-cm  
270 outward plane). Despite evidence for adaption to the randomized stimulation, there were no consistent  
271 aftereffects; instead, reaches tended to have a greater distribution of positional differences that averaged



272 to roughly zero (Fig. 5e; early washout difference from end baseline:  $-2.58 \times 10^{-3}$  cm;  $p = 0.957$ , one-  
273 sample t-test).

274

### 275 **A cerebellar model accounts for experimental adaptation and aftereffect dissociation**

276 To better understand the non-intuitive adaptation profile of position-randomized stimulation, we modified  
277 a simple model of PC firing based on a previously published study<sup>62</sup>. As an input, the model takes 2  
278 populations of 500 parallel fibers, each modulated briefly for 30 ms, that as a population tiled a 400-ms  
279 epoch, modeling a hypothetical movement (Fig. 6a). At equilibrium, the two populations of parallel fibers  
280 are perfectly balanced during the movement and cause no deviation in the PC firing rate from trial to  
281 trial. The model employed a learning rule such that any elevation of the PC rate from this equilibrium  
282 would lead to depressing the weights of parallel fibers active at the time of deviation through a Cspk-like  
283 error signal, as in cerebellar LTD. Conversely, parallel fibers with depressed weights relax back to  
284 baseline levels in the absence of Cspks. We titrated the learning rate to match that observed in fixed-  
285 position stimulation experiments (see Methods).

286 First, we modelled fixed-position optogenetic-perturbation experiments by artificially increasing  
287 parallel fiber activity in a random subset of 100 parallel fibers for 50 ms in the middle of the hypothetical  
288 movement (Fig. 6a). Initially, this caused a large deviation in the PC firing rate in the stimulated window,  
289 resulting in an error and synaptic depression of the concomitantly active parallel fibers (Fig. 6b). Over  
290 several repeated perturbation trials this reweighting minimized the effect of the perturbation, correcting  
291 PC firing rate back to baseline. After 20 trials, we removed the perturbation. The model output then  
292 exhibited opposing aftereffects in PC firing rate at the previous time of perturbation, before eventually  
293 relaxing back to baseline. The adaptation profile was quantitatively similar to the empirically observed  
294 behavior. Importantly, we note that the aftereffect seen in the PC firing profile is a consequence of  
295 depressed weights in both perturbed parallel fibers and other unperturbed parallel fibers that were  
296 coincidentally active at the time of the perturbation (Fig. 6c,d). Thus, the model was unable to distinguish  
297 the difference between parallel fibers that caused or did not cause a deviation from the target PC activity  
298 within the perturbation epoch.

299 Next, we modeled the position-randomized mossy fiber stimulation paradigm (Fig 6e-g). As with the  
300 empirical results, we saw a reduction in the magnitude of the perturbation effect, consistent with high  
301 probabilities of Cspks around the time of a perturbation – that is, the perturbed inputs are subject to  
302 learning because they are always aligned to the error that follows (Fig. 6e). While the magnitude of  
303 adaptation was smaller than observed in the fixed position model, we found that the model learning  
304 plateaued late in the perturbation block, similar to empirical observations (Fig. 6g). When the  
305 perturbation was removed, there were minimal aftereffects, also consistent with experimental data.

306 Model weights at the end of perturbation show that this absence of aftereffects is explained by the lack  
307 of accumulated learning in coincidentally active parallel fibers; *i.e.*, when perturbations are distributed  
308 across the movement, coincidentally active parallel fibers are different from trial to trial, and therefore  
309 subjected to only transient plasticity (Fig. 6f). Thus, in randomized stimulation, the presence of  
310 adaptation illustrated a mechanism by which the cerebellum distinguishes cause-and-effect using time:  
311 adaptation is explained by the conserved causal relationship between stimulated PC inputs and error,  
312 while the absence of an aftereffect is the result of unaccumulated trial-over-trial learning in coincidentally  
313 active non-stimulated inputs. By contrast, aftereffects in the fixed position paradigm are a consequence  
314 of the system generalizing attribution of error to fibers that were merely coincidentally active relative to  
315 perturbation but did not necessarily drive error.

316

### 317 **Discussion**

318 Here we discovered a naturally occurring PC population pause during mouse reaching movements that  
319 scaled with the velocity of outreach and occurred shortly before the transition to the decelerative phase  
320 of movement, reminiscent of emergent PC population kinematic coding in oculomotor vermis during  
321 saccades<sup>41</sup>. We speculate that this pause is a type of conditioned response: sensorimotor information  
322 relayed through mossy fibers act as learned cues for PCs to scale the decelerative phase of movement  
323 via disinhibition of the anterior interposed nucleus. We further demonstrate kinematic effects of mossy  
324 fiber stimulation that decrease over trials, akin to sensorimotor adaptation, with concordant changes in  
325 PC activity that imply cerebellar associative learning. We observed a surprising dissociation of the  
326 adaptation and aftereffect profile seen with block perturbation experiments when randomizing the  
327 position of stimulation during reach, designed to test the reliance of adaptation on perturbation context.  
328 A model demonstrated that aftereffects are a consequence of misattribution of error to consistently  
329 coactive parallel fibers. Conversely, the dissociation of adaptation and aftereffects reflects a lack of  
330 accumulated plasticity at a single point during the movement.

331 By demonstrating remapping of inputs to outputs of the cerebellar cortex, we link concepts developed  
332 in delay eyeblink conditioning to adaptation of a skilled volitional movement. Specifically, the mossy fiber  
333 stimulation used here to drive reach perturbations is analogous to mossy fiber stimulation used as a  
334 conditioned stimulus in eyeblink conditioning. We speculate that motor plan or early kinematic  
335 information acts endogenously as such a conditioned stimulus associated with reach outcome that,  
336 when erroneous, drives cerebellar learning<sup>47</sup>. We note some nuanced differences between paradigms,  
337 however. For instance, adaptation to pontocerebellar stimulation occurs within tens of trials, many fewer  
338 than conditioned eyeblink responses, which require hundreds of pairings<sup>63</sup>. However, non-human  
339 primates and cats exhibit rapid adaptation consistent with our results in other sensorimotor adaptation

340 paradigms<sup>30,64</sup>. One possible explanation for these different learning speeds is the richness of a  
341 temporal basis set that may emerge in the cerebellar granule cell layer in response to inflow of efferent  
342 commands and sensory feedback during movement compared to a relatively impoverished basis set  
343 from an invariant, unimodal conditioned stimulus. Indeed, locomotion concurrent with eyeblink training  
344 expedites learning<sup>65</sup>, consistent with this view. Further, eyeblink responses are generated *de novo*,  
345 where PCs must develop a novel response to an unfamiliar stimulus. Conversely, pontocerebellar  
346 stimulation during reach alters the execution of a movement for which a mossy fiber to cerebellar output  
347 mapping may already exist. Thus, PCs must simply adjust already existing responses, potentially  
348 speeding the rate of learning.

349 Another conspicuous departure from learning seen in eyeblink conditioning is that mossy fiber  
350 stimulation during reach drives an error. Thus, the unconditioned stimulus is not externally imposed but  
351 is rather the erroneous behavior that results from the perturbed mossy fiber activity. In this sense, the  
352 mossy fiber activity that interferes with cerebellar control acts as both a conditioned stimulus and  
353 generates a movement error that acts as an unconditioned stimulus to drive learning. In addition,  
354 eyeblink conditioning involves the cerebellum associating two stimuli that are not causally linked (*i.e.*,  
355 the tone does not cause an air puff) while reach adaptation associates sensorimotor information that is  
356 causal to reach error (*i.e.*, the erroneous motor commands generated by the cerebellum cause a reach  
357 error). Because this conditioned stimulus cannot be decoupled from the movement error, adaptation  
358 should always occur with repeated stimulation even under randomized stimulus conditions. In the case  
359 of external perturbations of limb movements, randomizing the direction of perturbations on reaching  
360 movements manifests as reach adaptation on the subsequent trial<sup>66</sup>, but adaptation does not accumulate  
361 because the cause of errors cannot be predicted. Our randomization experiments have a key difference:  
362 the internally perturbed mossy fibers are a consistent source of error, allowing the system to drive  
363 adaptation to these inputs. Importantly, because these perturbed inputs have no temporal correlation  
364 with the movement, no aftereffects are produced in the native population of mossy fibers active in the  
365 absence of stimulation.

366 Isolating a locus of skilled reach adaptation to the cerebellum poses an important conceptual hurdle.  
367 Cerebral cortex is a major input to the pontine nuclei – the focus of perturbation in this study – thus  
368 learning in motor cortex must be accounted for in cerebellar contributions to movement. Likewise,  
369 cerebellar outputs relay information back to motor cortex indirectly via thalamus<sup>67–70</sup>. Previous work has  
370 demonstrated that reach-associated pontocerebellar stimulation drives activity in motor cortex<sup>32</sup>,  
371 meaning each learner in this loop stays apprised of the activity in the other. Could plasticity sites outside  
372 the cerebellum account for our observations? Our data argue for a locus of learning in the cerebellum  
373 in two major ways: First, we observe a reduced efficacy of mossy fiber drive onto Purkinje cells over

374 many repeated trials. A parsimonious explanation is that highly-plastic parallel fiber synaptic weights are  
375 changing during adaptation rather than cortical commands overriding these proximal perturbations.  
376 Second, if PC firing rate changes were caused by modulated afferents to the cerebellum, it would be  
377 difficult to reconcile such a mechanism with adaptation to randomized stimulation because these  
378 compensatory cerebellar inputs could not predict the time of stimulation.

379 How might multiple connected brain regions, all of which are implicated in learning, accomplish  
380 learning a task in parallel? In our study, mice were expertly trained when we introduced optogenetic  
381 perturbation of inputs. Thus, stimulating pontocerebellar fibers, we corrupted the relationship of action  
382 directed by motor cortex and the established cerebellar response tuned to that action. Through  
383 adaptation, the cerebellum learned to assist movements with these newly modified inputs as evidenced  
384 by the diminishing kinematic effect on the limb; when stimulation was removed, the novel mismatch of  
385 cortical and adapted cerebellar contribution to the movement again manifests as movement errors.  
386 While our data are in line with associative learning paradigms as an explanation for motor adaptation  
387 (*i.e.*, direct policy learning<sup>71</sup>), they do not preclude the possibility that associative mechanisms are being  
388 used to tune a forward internal model that, when erroneous, changes to adapt the efficacy of the inputs  
389 and thus the accuracy of the model.

390

391

392

393

394

395

396

397

398

399

400

401

402

403

404

405

406

407 **Methods:**

408 *Animals*

409 All procedures followed National Institutes of Health Guidelines and were approved by the Institutional  
410 Animal Care and Use Committee at the University of Colorado Anschutz Medical Campus. Animals were  
411 housed in an environmentally controlled room, kept on a 12 h light/dark cycle and had ad libitum access  
412 to food and water except during behavioral training and testing as described below. Adult C57BL/6  
413 (Charles River Laboratories) mice of either sex (11 females, 6 males) were used in all experiments.

414

415 *Surgical procedures*

416 All surgical procedures were conducted under Ketamine/Xylazine anesthesia. After induction of  
417 anesthesia, the surgical site was cleaned and subcutaneously injected with bupivacaine (2.5 mg/mL).  
418 Pressure injections of approximately 150 nL of AAV2-hSyn-ChR2-mCherry were stereotaxically targeted  
419 to the left pontine nuclei (-4.0 mm anterior-posterior, -0.5 mm medial-lateral, -5.4 mm dorsal-ventral,  
420 measured from bregma) and animals were allowed to recover for a minimum of 8 weeks to ensure  
421 expression in mossy fiber terminals in the cerebellar cortex. Custom made aluminum head plates were  
422 affixed to the skull centered on bregma with luting (3M) and dental acrylic (Teet's cold cure). Optical  
423 fibers (105 mm core diameter, Thor Labs) attached to a ceramic ferrule (1.25 mm, Thor Labs) were  
424 implanted into the primary fissure, between Lob 4/5 and Simplex (-6.25 mm anterior-posterior, 1.9 mm  
425 medial-lateral, measured from bregma) at a depth of 1.2 mm<sup>72</sup>. For recording experiments, a craniotomy  
426 was made medial to the fiber placement and a recording chamber was secured with dental acrylic as  
427 previously described<sup>73</sup>.

428

429 *Behavioral task*

430 Animals were allowed a minimum of 2 days of recovery after head fixation surgery, then were food  
431 restricted to 80-90% of their baseline weight for reach training. Mice were habituated to the headfixed  
432 apparatus by presenting food pellets (20 mg, BioServ #F0163) that could be retrieved with their tongue,  
433 then pellets were progressively moved further from the mouth until animals began reaching for food.  
434 Pellets were positioned to the right of the animal to encourage reaching with the right forelimb and moved  
435 to a consistent position specific to each mouse ~1.2 – 2.5 cm from reach start. Sessions lasted until  
436 animals successfully retrieved 20 pellets or until 30 minutes had elapsed, whichever came first. Mice  
437 were trained for a minimum of 15 days and were considered fully trained once they could successfully  
438 retrieve 50% of pellets 3 days in a row.

439

440 *Kinematic tracking and closed-loop optogenetic stimulation*

441 Hand position was tracked in real time using an infrared-based machine-vision motion-capture system  
442 (6 Optitrack Slim3U Cameras mounted with LED ring arrays, Motive software) at 120 frames-per-second  
443 as previously described<sup>2</sup>. Cameras were positioned in front and to the right of the animal and focused  
444 on the approximately 8 cm<sup>3</sup> spatial volume that covered the reach area of the right forelimb. 1-mm  
445 diameter retroreflective markers were used for camera calibration and affixed to the mouse hand for  
446 kinematic tracking. A custom-built calibration wand and ground plane were used to set position and  
447 orientation of the cameras in Optitrack Motive software. Camera calibration was refined monthly to  
448 account for any drift of the cameras over time. Calibrations that reported a mean triangulation error <0.05  
449 mm were considered passes. The spatial origin was set to be at the center of the bar where mice placed  
450 their hand during rest. Spatial blocking and camera detection thresholds were adjusted to prevent  
451 erroneous tracking of minimally infrared-reflective objects.

452 Real-time hand positions were streamed into MATLAB (2018a) with a latency under 1 ms. Custom-  
453 written MATLAB code was used to detect when the hand passed a positional threshold 1-cm outward  
454 from the bar where the mice rested their hand then send a 'go' signal to an Arduino microcontroller (Uno)  
455 which triggered a laser (1.5-5 mW) with TTL pulses. To ensure low-latency closed-loop stimulation we  
456 used an open-source C++ dynamic link library<sup>74</sup> edited to reflect the parameters of laser stimulation (50-  
457 ms stimulation, 100 Hz, 2-ms train). This system has a closed-loop latency of 9.5 ms from the time of  
458 threshold crossing (120 fps camera frame rate, 0.5 ± 0.1 ms (mean ± SD) MATLAB-Arduino  
459 communication). Hand positions and stimulation times were streamed into MATLAB and saved for post-  
460 processing.

461

#### 462 *Kinematic analysis*

463 All kinematic analysis was performed using custom-written MATLAB code. First, erroneously tracked  
464 objects were removed using a nearest neighbor analysis, which assessed the closest markers in  
465 subsequent frames and removed others, to produce a single positional trajectory of the hand marker  
466 over time. Any dropped frames where the marker was not detected were interpolated over, then data  
467 were filtered using a 2<sup>nd</sup>-order low-pass Butterworth filter (10 Hz)<sup>75</sup> using MATLAB's zero-phase filter  
468 function "filtfilt". Last, interpolated points were removed such that the filtered marker positional data  
469 reflected only data captured during the experimental session.

470 To segment continuous data into reaches, we found instances of the marker passing the 1-cm  
471 positional threshold in the outward direction and clipped 10-s segments centered on this time point. We  
472 defined outreach as the segment of this data from the time before threshold crossing that the hand  
473 exceeded 2 cm/s in outward and upward velocity to the time after threshold crossing where the hand  
474 stopped moving in the positive outward direction (outward velocity < 0 cm/s). Occasionally, the marker



475 would become obscured behind the pellet holder during reach or spurious detection of the nose would  
476 jump the marker position to the nose and be detected as a reach. Therefore, to prevent against analyzing  
477 reaches that had large segments of data missing, any threshold crossings where the marker dropped  
478 greater than 25% of points between the start and end of outreach were not considered for further  
479 analysis.

480 Reach velocity and acceleration were calculated using the numerical gradient between position  
481 timepoints in each dimension. To produce aligned reach position curves, we interpolated data at 10 ms  
482 centered on the time the hand passed the 1 cm positional threshold crossing in outward direction. The  
483 effect of stimulation was assessed by measuring changes in stimulation and washout reaches (early,  
484 middle, and late) relative to the last 5 baseline reaches in the 50-ms interval following the end of  
485 stimulation. To assess the unadapted effect of stimulation or washout, early reaches were defined as  
486 the first reach in each block; middle and late reaches were the middle 5 and last 5 reaches of reach  
487 block, respectively. To align random-stimulation position reaches, we found the positional threshold of  
488 stimulation on each reach, then aligned stimulation reaches and baseline reaches to the time they  
489 crossed this boundary during outreach, averaged across reaches, then measured the difference in these  
490 curves, yielding the stimulation-aligned positional difference between end baseline and stimulation  
491 reaches. For washout reaches in random-position stimulation experiments, reaches were aligned to the  
492 time of the threshold crossing at 1 cm such that the aftereffect could be compared to fixed-position  
493 stimulation experiments. To account for varying effects of stimulation seen across animals (hypermetric  
494 and hypometric movements), the direction of positional change in early stimulation reaches relative to  
495 baseline for each animal in random- or fixed-position stimulation experiments was defined as the  
496 positive direction and the opposing direction as negative for that animal in each paradigm, allowing us  
497 to group data across animals with diverging effects. To assess the time course of stimulation effects  
498 within individual animals, we measured differences in position at each timepoint between the early  
499 stimulation reaches and baseline reaches using a Wilcoxon signed rank test. Reach endpoint probability  
500 density heatmaps (Fig. 2) were made by filtering endpoint positions with a two-dimensional gaussian  
501 filter (sd 0.35 mm).

502

### 503 ***Electrophysiology***

504 Craniotomies were made over the cerebellum ipsilateral to the reaching arm of in fully trained animals.  
505 A custom-made recording chamber was implanted over the craniotomy, the brain was covered with  
506 triple-antibiotic cream (Globe), and the recording chamber was sealed with Quik-sil silicone (World  
507 Precision Instruments) such that it could be preserved for multiple recordings.

508

509

510

### 511 *Single electrode recordings*

512 Single-electrode recordings were performed with 3-5 MOhm platinum/tungsten optrodes (Thomas  
513 Recording). Once animals were headfixed, the electrode was targeted to -6.25 mm anterior-posterior,  
514 1.9 mm medial-lateral (measured from bregma) then lowered into the brain up to a depth of 1.8 mm with  
515 a motorized micromanipulator (Newport Motion Controller, Model 861). Signals were band-pass filtered  
516 at 300-5000 Hz, amplified with a MultiClamp 700A amplifier (Axon Instruments), then digitized (CED  
517 Power3 1401) and recorded with Spike2 software (CED). Once a putative PC was isolated, the brain  
518 tissue was allowed to relax for 15 minutes. Cell sorting was performed offline using Psort<sup>76</sup>.

519

### 520 *Neuropixel recordings*

521 Neuropixels were lowered into the brain using a motorized micromanipulator (Sensapex uMP  
522 micromanipulator). Once the electrode shank spanned the putative PC layer, the tissue was allowed to  
523 relax for 15 minutes. Electrophysiology data was acquired using an OpenEphys system (<https://open-ephys.org/gui>).  
524 Data were sorted offline in Kilosort<sup>277</sup> and manually curated in phy  
525 (<https://github.com/cortex-lab/phy>).

526

### 527 *Neural data analysis*

528 Following sorting, isolated units were analyzed offline using custom-written MATLAB code. In well-  
529 isolated single-electrode units, simple spikes and identifiable Cspks were sorted using Psort. To identify  
530 Cspks in Neuropixel recordings, we cross-correlated cells with high firing rates in the cortex with adjacent  
531 low-firing-rate clusters and looked for the presence of a Cspk-aligned simple spike pause and  
532 characteristic simple spike and Cspk waveforms. In many cells Cspks could not be identified across the  
533 length of the experiment. In these cases, we identified PCs based on cortical location and  
534 electrophysiological criteria using the firing rate, CV2, and median absolute difference from the median  
535 interspike interval (MAD)<sup>78</sup>. Cerebellar cortical cells with a firing rate > 40 spikes/s, CV2 > 0.20, MAD <  
536 0.008 were labeled as PCs (Fig. S2). Instantaneous firing rates for PCs were calculated by taking the  
537 inverse of the ISI between spikes, convolving with a 20-ms gaussian, then sampling at 10-ms intervals.  
538 In Neuropixel recording adaptation experiments we analyzed reach modulated PCs, defined as exhibiting  
539 a firing rate change during the reach epoch  $\geq 1$  standard deviation of the mean firing rate of the cell. To  
540 find the time and magnitude of firing rate pause in grouped population PC data, we found the first local  
541 minimum in smoothed firing rate traces that occurred after reach onset.

542 In pontocerebellar stimulation experiments, to assure that observed simple spike adaptation was not  
543 the result of changing unit isolation across the experiment, we assessed unit stability with two metrics:  
544 waveform correlation and unit displacement across the experiment<sup>79</sup>. To assess waveform correlation,  
545 we isolated the template waveforms for each unit on the electrode with the greatest spike amplitude and  
546 the 32 surrounding electrodes (33 total). We averaged 1000 randomly selected spike waveforms for  
547 each channel from the baseline block and the washout block, concatenated waveform templates across  
548 the 33 channels, then correlated the concatenated waveforms from the baseline and washout blocks  
549 (Pearson correlation). As a shuffled control, we correlated concatenated templates from neighboring  
550 units in the baseline and washout block. Neighboring units were defined as those whose 32 surrounding  
551 electrodes overlapped with the unit of interest. PCs whose across experiment waveform correlation did  
552 not exceed the 99<sup>th</sup> percentile (0.735) of the across-unit shuffled control correlation were excluded from  
553 further analysis.

554 To assess cell displacement across the experiment we calculated the position of unit  $(x, y)$  using  
555

556 
$$(x, y) = \left( \frac{\sum_{i=1}^N x_i a_i^2}{\sum_{i=1}^N a_i^2}, \frac{\sum_{i=1}^N y_i a_i^2}{\sum_{i=1}^N a_i^2} \right)$$

557  
558 where  $N$  is the number of electrodes,  $x_i$  and  $y_i$  are the lateral and upward position of the electrode, and  
559  $a_i$  is the peak-to-peak spike waveform amplitude on the  $i^{\text{th}}$  electrode. Unit displacement was defined as  
560 the Euclidean distance between unit positions in the baseline and washout blocks. As a shuffled control,  
561 the displacement between neighboring units (as defined above) across the experiment was calculated.  
562 PCs whose displacement was above the 1<sup>st</sup> percentile (2.172  $\mu\text{m}$ ) of shuffled control were excluded  
563 from further analysis.

### 564 565 *LASSO regression*

566 To quantify the variance of PC simple spike firing rate that could be explained by reach kinematics, we  
567 used least absolute shrinkage and selection operator (LASSO) regression<sup>34</sup>. LASSO has the advantage  
568 of performing both regressor selection and regularization, producing a sparse model of many correlated  
569 kinematic regressors. 23 kinematic variables were used as regressors, including position, velocity, and  
570 acceleration in the upward, outward, and lateral directions, speed, unsigned acceleration, with each  
571 velocity and acceleration term additionally broken into positive and negative components. A full list of  
572 regressors is included in Fig. S3. Data for each reach were clipped into 2-s segments centered at the  
573 time of a 1-cm threshold crossing in the outward direction. Regression was performed using a custom-  
574 written MATLAB code using the “lasso” function. All kinematic data were standardized to have a mean

575 of 0 and a variance of 1, and regression was performed with a 10-fold cross validation to avoid overfitting.  
576 To find the appropriate offset of firing rate and kinematics, instantaneous simple spike firing rates for  
577 each reach were offset by lags from 0 ms to -300 ms (firing rate leading kinematics) in 10-ms steps. The  
578 lag that minimized the mean squared error (MSE) of the regression was selected for each cell. To  
579 calculate the variance of firing rate explained, the predicted firing rates from the best fit regression were  
580 calculated from the kinematic data and compared to empirical data.  $R^2$  was calculated using:

581

$$582 \quad R^2 = 1 - \frac{SS_{res}}{SS_{tot}}$$

583

584 where  $SS_{res}$  is the sum of squared residuals and  $SS_{tot}$  is the total sum of squares.

585 For the spike shuffled control, spike times on individual trials were shuffled in time so that each reach  
586 epoch had the same mean firing rate, then converted to instantaneous firing rates as described above.  
587 For the reach shuffled control, reaches were assigned to firing rates recorded on different reaches. For  
588 both controls regressions were performed at the lag that minimized the MSE for empirical data and  
589 repeated 100 times;  $R^2$  values of each shuffled control were taken as the average of these 100  
590 regressions. To assess the unique contribution of individual kinematic regressors to the fraction of  
591 variance explained in the empirical data regression, each regressor was time shuffled independently  
592 and regressions were repeated. The change in  $R^2$  value between the regressor shuffled regression  
593 compared to the complete empirical data model is the fraction of unique contribution to total variance  
594 explained for each kinematic variable<sup>40</sup>.

595

### 596 *Cerebellar model*

597 The cerebellar model in the paper was derived from a previously published model<sup>62</sup> and written using  
598 custom code in Python. A major difference between our paper's model and the cited model is the  
599 assumption of a continuous temporal input of parallel fiber activity distributed across a hypothetical 400-  
600 ms movement, rather than a single parallel fiber input trial over trial. The model PC was fed 1000 parallel  
601 fibers that either increased or decreased their activity from baseline for 30 ms during a 400-ms interval,  
602 mimicking hypothesized temporal basis sets produced by the granule cell layer<sup>80-82</sup>. PC firing at time  $t$   
603 on the  $n^{\text{th}}$  trial was calculated as the sum of the weighted contribution of all parallel fibers at time  $t$ :

604

$$605 \quad PC_n(t) = PC_0(t) + \sum_i^{1000} w_n^i PF_n^i(t)$$

606

607 Here,  $w_n^i$  is the weight of parallel fiber  $i$  on the  $n^{\text{th}}$  trial and  $PC_0$  is the baseline firing rate of the PC.  
608 Parallel fiber weights were adjusted following each trial according to two parameters: the probability of  
609 a Cspk as a function of trial error  $\beta P(CS|E_n)$  where  $\beta$  dictates the strength of synaptic depression in  
610 response to a Cspk, and a decay term,  $\alpha_{PF}$ , that relaxes parallel fiber weights back to their initial value  
611  $w_0^i$ :

612

$$613 \quad w_{n+1}^i = \begin{cases} w_n^i - (1 - \alpha_{PF})(w_n^i - w_0^i) - \beta P(CS(t)|E_n(t)) & \text{if } PF^i(t) > 0 \\ w_n^i - (1 - \alpha_{PF})(w_n^i - w_0^i) & \text{if } PF^i(t) < 0 \end{cases}$$

614

615 The probability of a Cspk is a function of  $t$ , where greater deviations in the PC rate from baseline at time  
616  $t$  lead to greater probabilities of Cspks. Specifically, we took the mean error in the preceding 25-ms  
617 interval ( $E_n(t)$ ) to calculate the probability of a Cspk at each time in the movement interval:

618

$$619 \quad P(CS(t)|E_n(t)) = \frac{a}{1 + e^{-\tau E_n(t)}} - \frac{a}{2}$$

620

621 To obtain values for the parameters  $a$  and  $\tau$ , we fit a curve to the change in position of early, middle,  
622 and late stimulated reaches in fixed-position stimulation experiments, then took the derivative of this  
623 curve to obtain the error correction (trial-over-trial positional change) for a given error magnitude.

624 We ran the simulations mimicking the experimental block structure used for empirical data, including  
625 a baseline block with no perturbation, an experimental block with a perturbation on every trial, and a  
626 washout block with the perturbation removed. For perturbation trials, we added activity to a random  
627 subset of 100 parallel fibers at  $t = 200$  ms for 50 ms that, when combined, drove 40 simple spikes/second  
628 in PCs at their initial weights. After 20 such trials, the perturbation was removed, and the model was run  
629 for an additional 20 washout trials. To simulate random-position perturbation experiments, the time of  
630 perturbation was changed on every trial.

631

## 632 **Acknowledgements**

633 We thank the members of the Person lab for critical feedback on the manuscript; the Neurotechnology  
634 Center at the University of Colorado Anschutz Medical campus for use of core facilities including the  
635 Advanced Light Microscopy Core and the Optogenetics and Neural Engineering Core. We thank Mr.  
636 Michael Spindle and Ms. Elena Judd for technical assistance. Work was supported by F31 NS113395-  
637 01 to DJC; and NS114430, NSF CAREER 1749568, and by a grant from the Simons Foundation as part  
638 of the Simons-Emory International Consortium on Motor Control to ALP.

639

640 **Contributions**

641 DJC and ALP designed experiments, interpreted data, and wrote the manuscript. DJC performed  
642 experiments, built the computational model, made figures, and analyzed data. MIB developed the closed-  
643 loop system, edited the manuscript, and contributed to early conceptualization of the project.

644



## Figures:

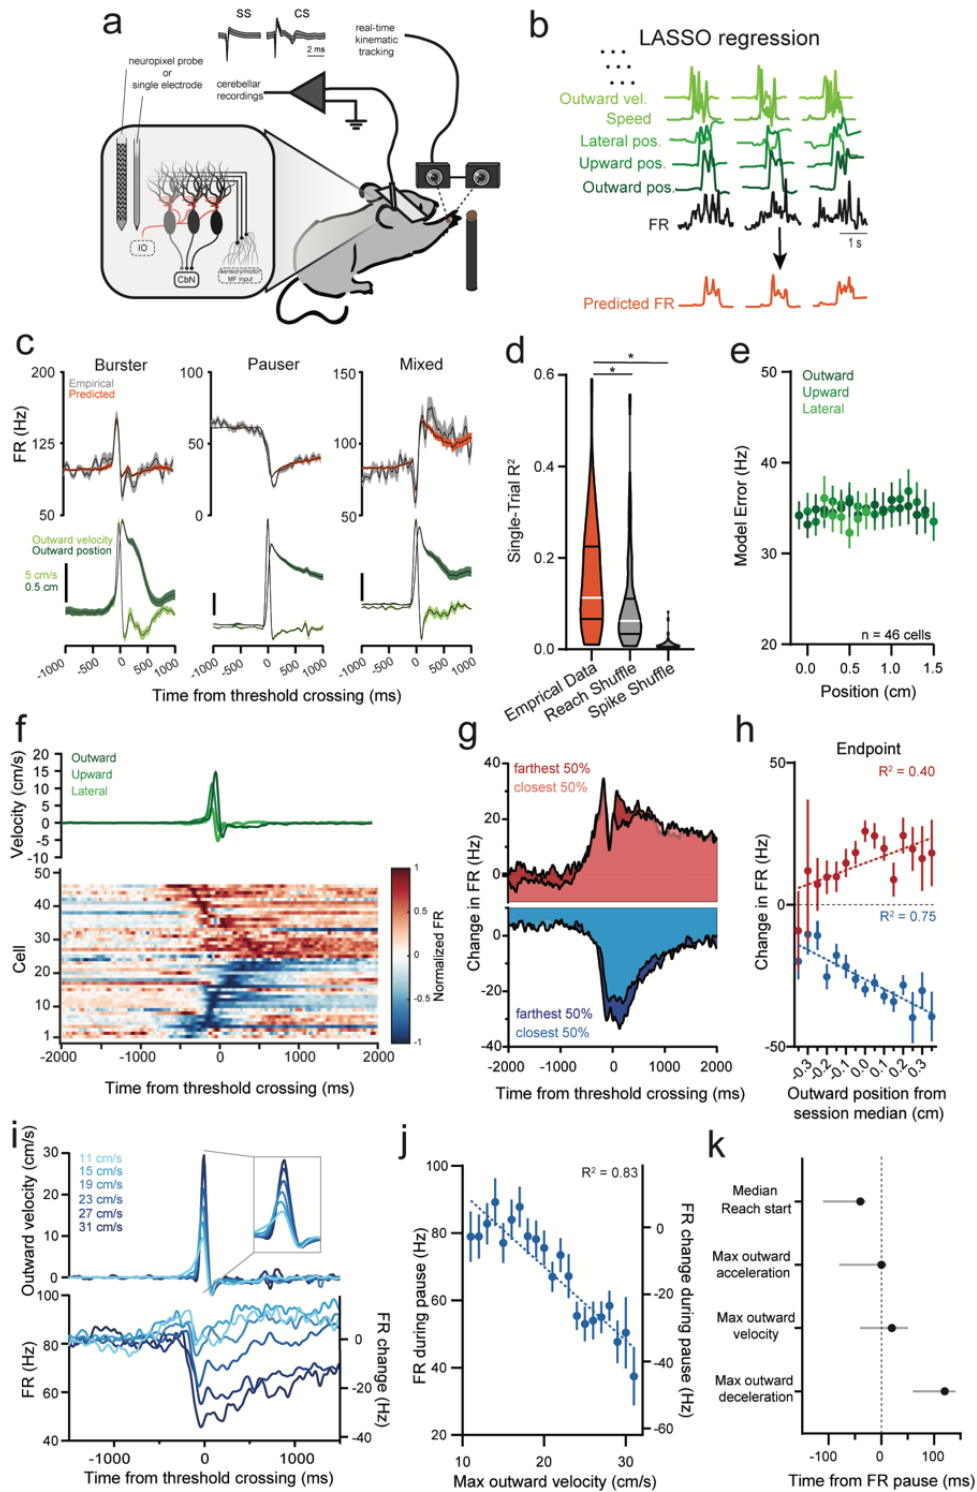

**Figure 1.** Net population activity in PCs predicts reach velocity.

- a. PCs of the deep central sulcus were recorded with either single electrodes or Neuropixel probes while the reaching hand was tracked in real-time with high-speed cameras.
- b. Kinematic regressors in multilinear LASSO regression were used to model firing rates on individual reaches across sessions.
- c. Examples of 3 PCs fit with LASSO regression. Top: trial-averaged empirical and LASSO predicted firing rates. Bottom: outward position and velocity aligned to firing rate at optimal lag.
- d. Modest single-trial  $R^2$  for single cells in empirical, reach shuffled, and spike shuffled LASSO regressions.
- e. Stable continuous encoding of reach kinematics across reach epoch seen with invariant absolute value of the difference in empirical firing rate and predicted firing rate (model error) across outward, upward, and lateral positions binned at 0.1 cm.
- f. During reach (green), PCs group roughly into bursters (red) and pausers (blue), aligned to the time the hand passed 'threshold', 1-cm in the outward direction.
- g. Depth of modulation scales with reach distance for both bursters (red) and pausers (pausers). 50% farthest and 50% closest reaches grouped.
- h. Change in firing rate for bursters (red) and pausers (blue) during outreach for endpoints binned at 0.05 cm in the outward direction relative to the median endpoint for each session.
- i. Pooling burst and pause PC populations reveals net pausing activity that scales with reach velocity. Top: Reach velocity curves binned at 4 cm/s for the population of reaches across all recorded PCs. Bottom: PC population firing rate corresponding to each bin (left y axis), firing rate change relative to 1-2 s before threshold crossing (right y axis).
- j. Firing rate during the pause in population activity was strongly negatively related to reach velocity binned at 1 cm/s.
- k. Time of population pause corresponds to time of peak outward acceleration and precedes deceleration. Plot relates the median timing of reach start, peak outward acceleration, peak outward velocity, and peak outward deceleration to the time of population simple spike pauses for all reach velocity bins ( $n = 21$  bins, 1 cm/s).

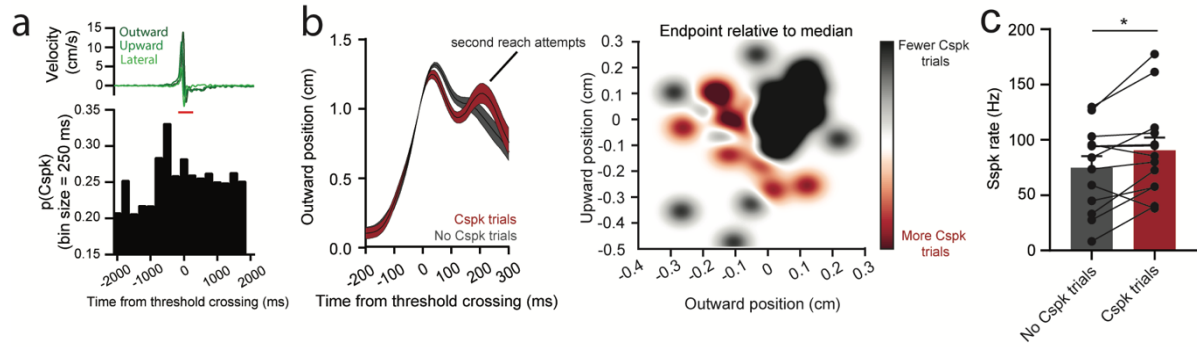

**Figure 2.** Reaches with Cspks have erroneous kinematics and elevated simple spike rates.

- Positive modulation of Cspks around the time of reach. Top: Mean velocity of reaches with Cspks recorded. Bottom: PETH of Cspk activity relative to the time of threshold crossing. Window used to define trials with Cspks spanned the outreach +250 ms (red bar).
- Kinematics from an example session separated into reaches with (red) and without Cspks (black). Left: positional profiles. Right: probability density heatmap of upward and outward endpoints.
- PC simple spike (Sspk) rates were significantly higher during outreach in trials with Cspks ( $n = 13$  cells).

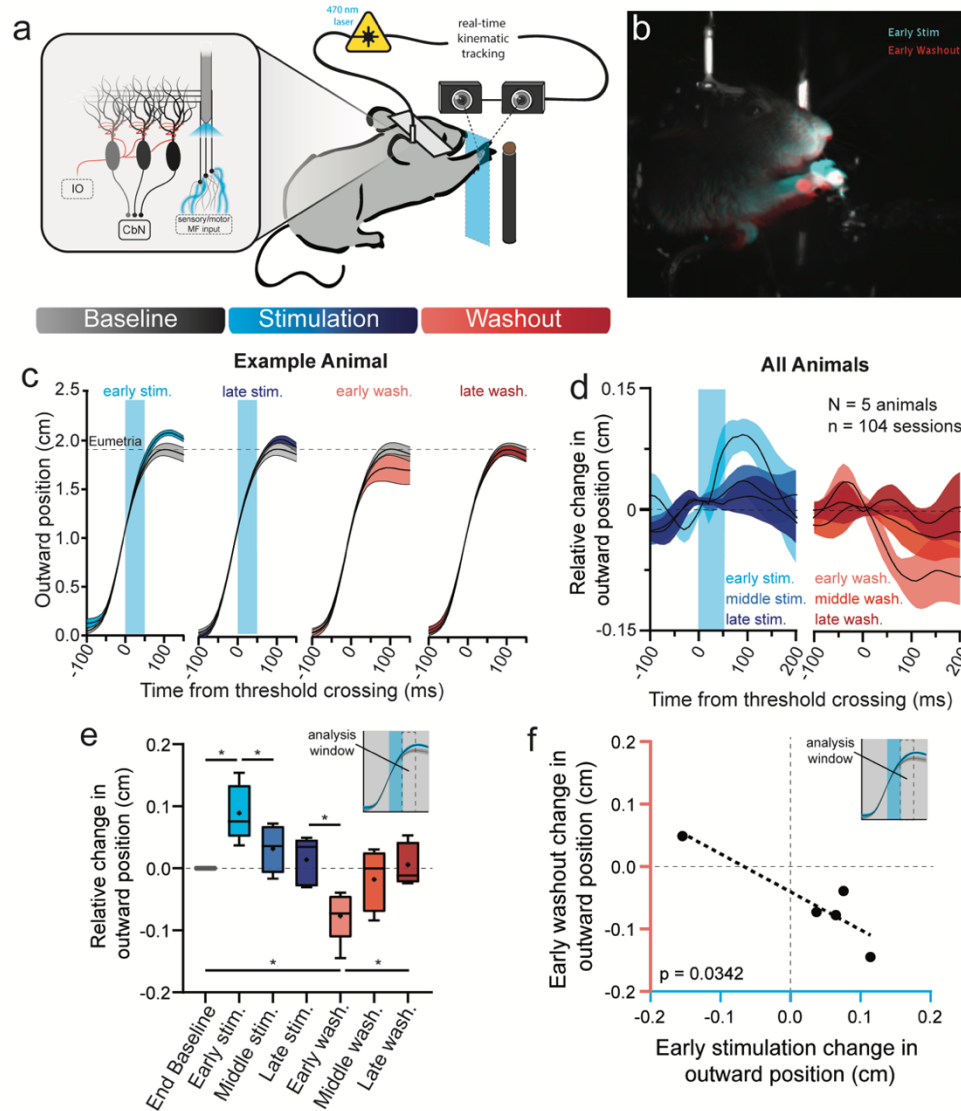

**Figure 3.** Adaptation to mossy fiber stimulation during reach.

- Headfixed mice expressing ChR2 in pontocerebellar mossy fibers were trained to reach for food pellets while the hand was tracked with high-speed cameras. On laser trials, light directed to cerebellar primary fissure through an implanted fiber was triggered in closed loop after the hand crossed a plane 1 cm outward from reach start position. Bottom: Perturbation schedule followed canonical adaptation structure, with a baseline (no-stimulation) block, stimulation block with stimulation on every reach, followed by a washout block with stimulation omitted.
- Hand position 100 ms after threshold crossing in the first stimulated (blue) and washout (red) reaches heading to the target (white).
- Hand position during baseline (grey), compared to hand position measured across the adaptation and washout blocks in an example mouse ( $n = 20$  sessions). Blue shading denotes the time of mossy fiber stimulation.
- Summary of stimulation-induced kinematic effects, which decay over the adaptation block and show opposing aftereffects. Baseline subtracted hand position, rectified relative to the direction of kinematic effect of stimulation, is shown for reaches in the early (first reach), middle (middle 5), and late (last 5) phases for both stimulation (blue) and washout (red) blocks.  $N = 5$  mice; 104 sessions.
- Summary of adaptation effects across animals and sessions. Relative change in outward position was assessed in the 50-ms window following the end of stimulation. Asterisks indicate statistically significant differences between blocks ( $p$  values reported in main text).
- The magnitude and direction of early stimulation effect was related to aftereffects. Plot shows linear regression relating the magnitude of the early stimulation effect and early washout effect compared to baseline reaches.

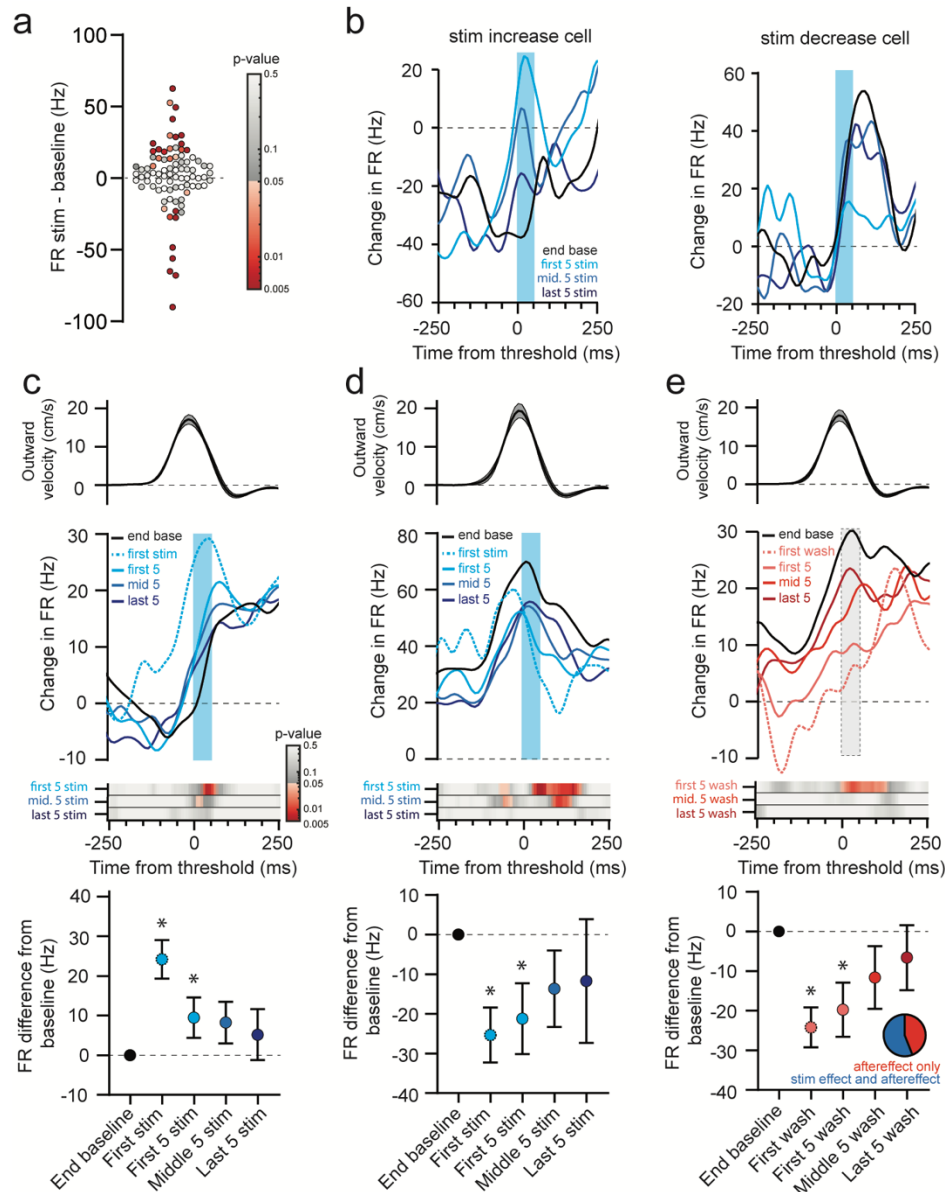

**Figure 4.** PCs show electrophysiological correlates of behavioral adaptation over the stimulation and washout blocks.

- Mossy fiber stimulation effect during reach of all reach-modulated PCs. The difference in simple spike rate during the stimulation window is compared to the same epoch during baseline reaches ( $n = 85$  cells). Significant differences are denoted by the color map on the right.
- Two example cells showing stimulation responses over the adaptation block. (Left) A cell that was positively modulated by stimulation. Colors denote firing rates computed at different points in the session. Black, end of baseline; Blue, light-dark first 5; middle 5, and last 5 reaches of the stimulation block. (Right) Same as left but for a PC that was negatively modulated by stimulation. Blue shading denotes the time of the 50-ms stimulation window.
- Population summary of activity of PCs firing rate adaptation over stimulation block for all PCs positively modulated by stimulation. Top: mean reach velocity for all sessions. Middle: Average baseline subtracted simple spike rates for the last 5 baseline reaches and the first, first 5, middle 5, and last 5 stimulated reaches. The heat map below indicates the point-by-point significance of differences of the first 5, middle 5, and last 5 stimulated reaches relative to the last 5 baseline reaches (10-ms bins). Bottom: Quantification of changes of PC rates compared between stimulation and baseline reaches, measured during the time window of the stimulation epoch.  $n = 19$  cells.
- Same as in **c**. but for the population of PCs negatively modulated by stimulation.  $n = 10$  cells
- Same as in **c**. but for the population of cells that showed significant decreases in washout block relative to baseline reaches, measured during the stimulation epoch. The pie chart indicates the number of “aftereffect cells” that also responded to stimulation.  $n = 25$  cells

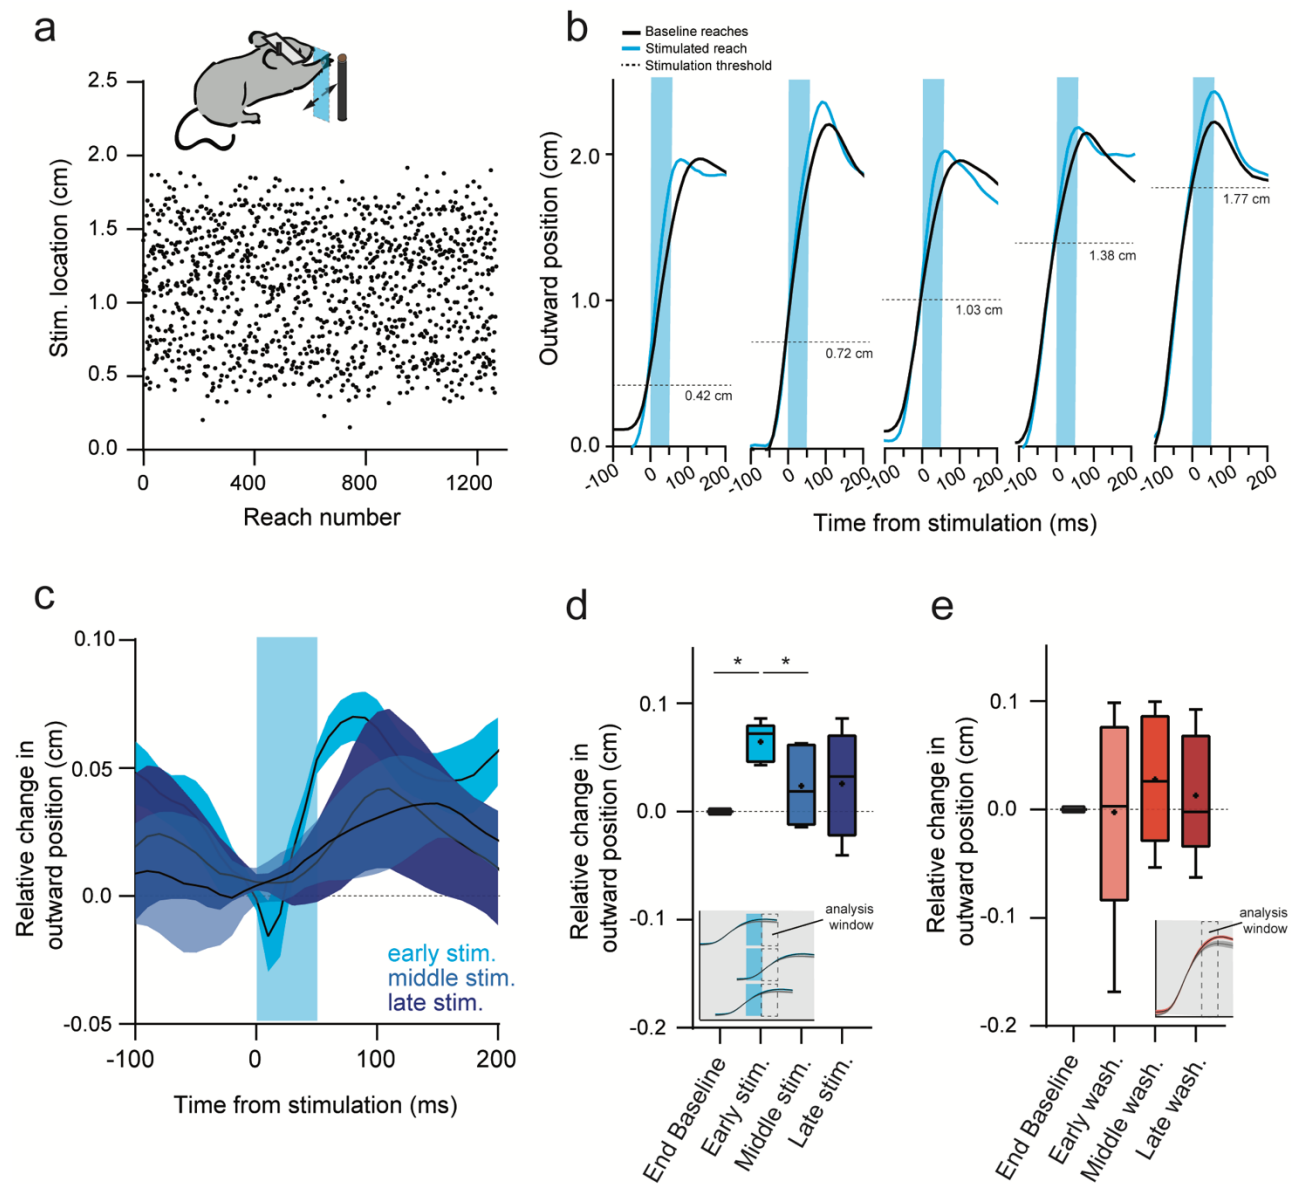

**Figure 5.** Dissociation of adaptation and aftereffects with randomized stimulation position.

- Stimulation location during outreach was distributed pseudorandomly between 0.3 and 1.8 cm in the outward direction during the stimulation block.
- Examples of reaches stimulated at 5 different locations during outreach. Each stimulated reach is compared to the last 5 baseline reaches of each session. The horizontal dashed line indicated the threshold crossing that triggered stimulation.
- Summary data of relative change in outward position for stimulation reaches in the early, middle, and late block. N=5 mice; 60 sessions.
- Quantification of stimulation effect on outward position across adaption block. For each reach, the analysis window was the 50-100 ms after stimulation onset aligned to the time of threshold crossing for each reach (inset).
- Quantification aftereffects on outward position during washout block. Here, the analysis window is the 50-100 ms after crossing the 1-cm threshold for each reach – the same as the analysis in fixed-position stimulation experiments.



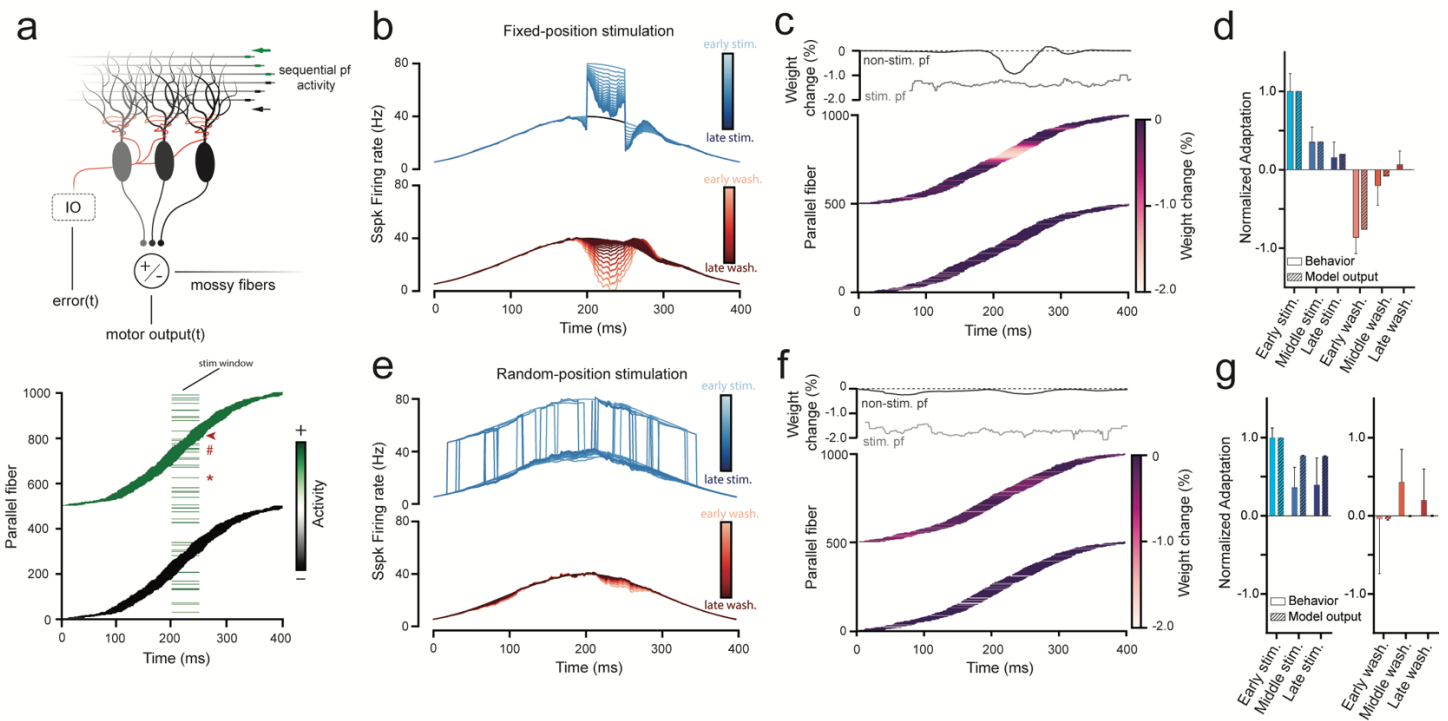

**Figure 6.** A cerebellar model accounts for adaptation and aftereffect dissociation.

- Schematic diagram of the temporal cerebellar-learning model. The model input is 1000 parallel fibers, divided into 2 balanced populations, activated during a brief window during a simulated 400-ms movement. The output of the PC module that receives this information is compared to the input in the cerebellar nuclei. At equilibrium, the 2 parallel fiber populations are perfectly balanced (one increases, and one decreases activity; bottom) and the PC module outputs an activity curve (gaussian) that spans the movement. Deviations from this normal curve (errors) lead to mismatch in the nuclei and subsequent activation of the inferior olive, which reduces the weights of parallel fibers active shortly before the error. To simulate optogenetic perturbation experiments (bar-code like pattern at 200 ms), a step of activity was added to a subset of parallel fibers for 50 ms in the center of the movement (fixed stim) or randomized across the block (random stim). Note that stimulation can either activate a cell twice (e.g. parallel fiber 617 \*) or overlap with endogenous activity (e.g. 756 #), and non-stimulated neurons can be endogenously active during the stimulus window (e.g. 805 arrow).
- PC simple spike activity during the stimulation block (top, blue) and washout block (bottom, red) showing progressively adapting response magnitudes during the adaptation block and progressively decaying aftereffects during washout.
- Parallel fiber weights at the end of the fixed-position stimulation block. Top: change in weights of “artificially” stimulated and non-stimulated parallel fibers plotted by time of endogenous activation. Bottom: heatmap of parallel fiber weight changes. Note population weight change concentrated at time of stimulation, seen in both artificially stimulated and unstimulated fibers during stimulation epoch.
- Comparison of model output to empirical observations for fixed-position stimulus conditions (Fig.3). Model closely matches behavioral adaptation.
- Same as **b.** but here the stimulation window is randomized across the reach.
- Same as **c.** but for random position stimulation experiments. Note the absence of clustered weight changes in unstimulated parallel fibers.
- Comparison of model output to empirical observations for random-position stimulus conditions (Fig.5) showing that both model and empirical observations show adaptation but not directional aftereffects.

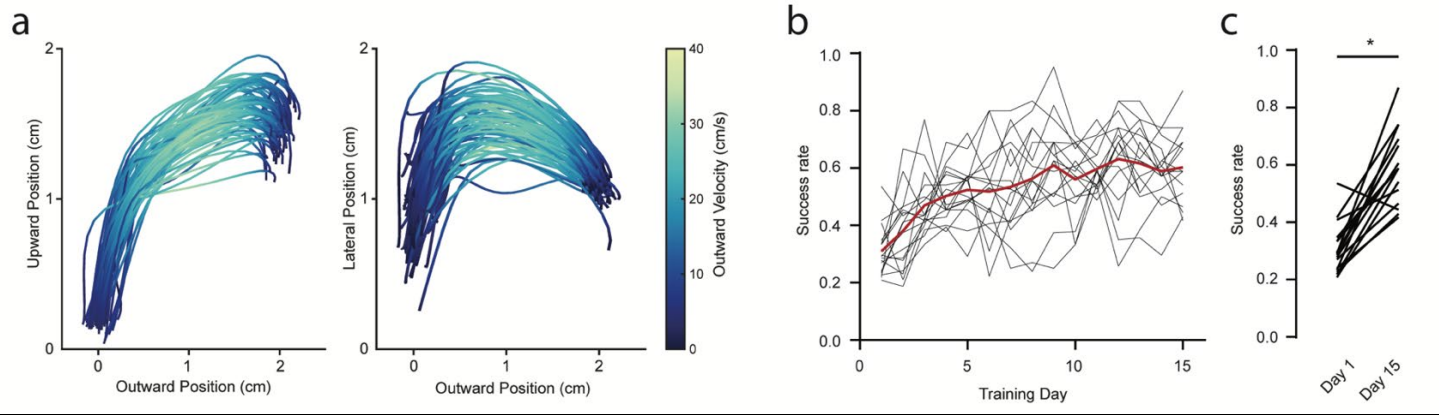

**Figure S1.** Reach tracking and reach performance over sessions.

- The right hand was tracked with high-speed cameras as mice reached upwards and outwards towards a food pellet. Positional outreach trajectories from a single session viewed are shown from a lateral (left) or bottom-up (right) vantage point with traces colored by the magnitude of outward velocity.
- Mice were trained for a minimum of 15 days on the reaching task. Pellet retrieval success was tracked throughout training for each mouse, mean is shown in red (n = 17 mice).
- Quantification of success rate on day 1 of training and day 15.

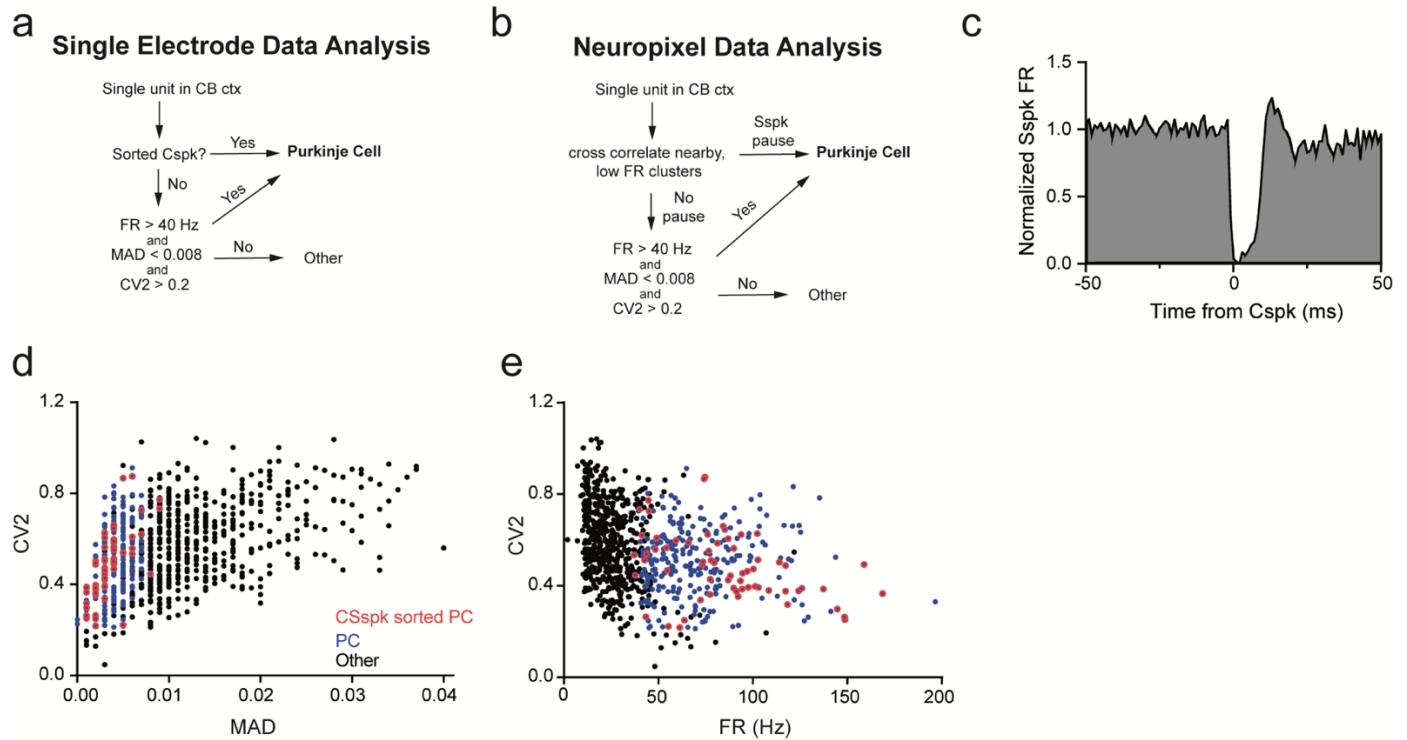

**Figure S2.** PC identification by firing rate characteristics.

- Cerebellar recordings using single electrodes were first anatomically targeted to cerebellar cortex. If a recorded cell had visible Cspks they were classified as PCs. Otherwise, if cells had a firing rate  $> 40$  Hz, a median absolute difference firing rate from the median interspike interval (MAD)  $< 0.008$ , and a CV2  $> 0.2$ , they were classified as PCs<sup>78</sup>.
- Neuropixel-recorded single units were cross correlated with nearby ( $< 200$  microns) low firing rate ( $< 5$  Hz) single units. If this cross correlation exhibited the characteristic firing rate pause seen in PC simple spikes after a Cspk, these units were classified as the simple spikes and Cspks of a single PC. If no pause was seen, cells that exhibited the same firing rate, MAD, and CV2 profile described in **a**. were classified as PCs.
- Example simple spike pause aligned to the time of a Cspk from a Neuropixel recording.
- MAD and CV2 values plotted for all recorded cells. Colors indicate whether a cell was a PC classified with Cspks (red), a PC classified by firing rate criteria (blue), or cells not classified as PCs (black).
- Same as in **d**. but plotting CV2 and firing rate for each cell.

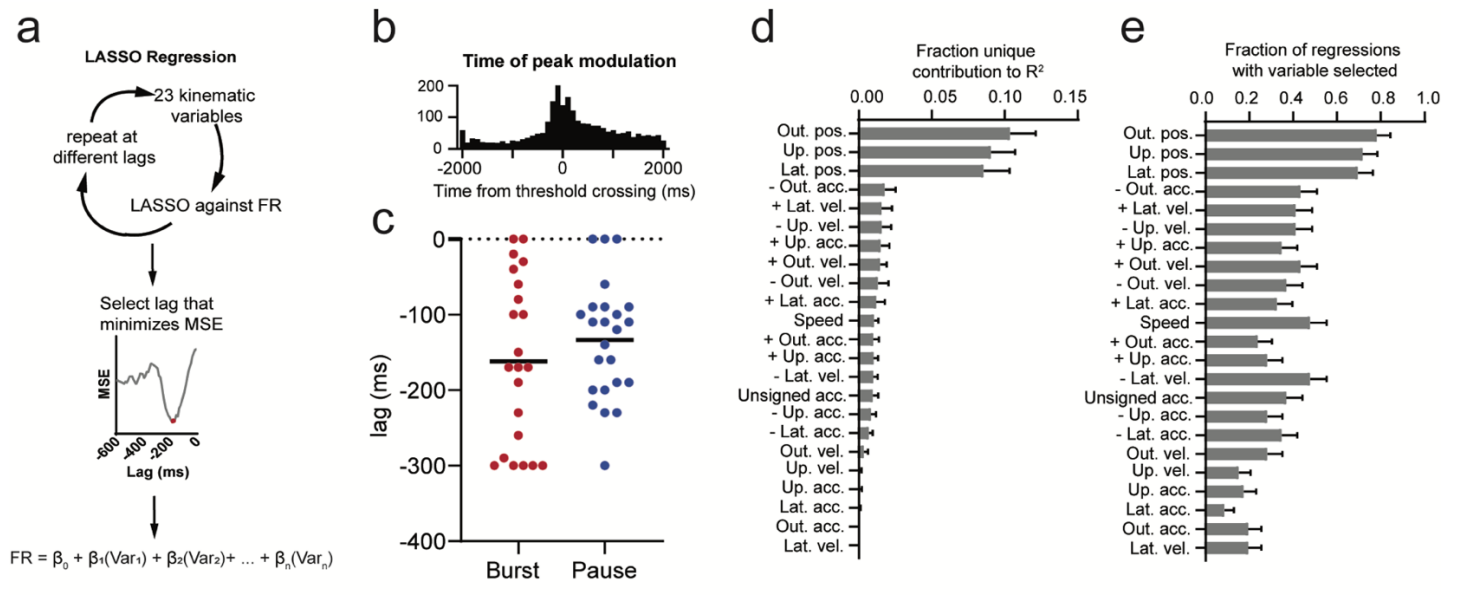

**Figure S3.** Lasso regression details.

- Schematic of lasso regressions. 23 kinematic variables were regressed against firing rate at different lags from 0 to -300 ms. The lag that minimized the mean squared error (MSE) of the regressions was selected.
- Peak modulation time of all cells across all reaches ( $n = 2391$  reaches, 46 cells).
- Optimal lags of the LASSO regression for each cell.
- Fraction of the unique contribution to total variance explained for each regressor.
- Fraction of regressions with each variable selected.

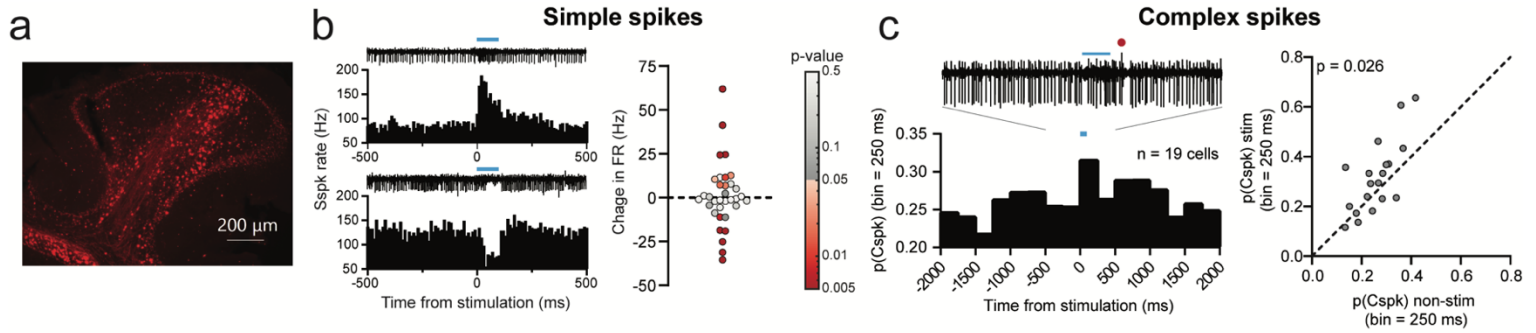

**Figure S4.** Changes in PC firing during optogenetic stimulation of mossy fibers.

- Mossy fiber boutons expressing hSyn-ChR2-mCherry in the cerebellar cortex.
- Simple spike responses to mossy fiber stimulation. Left: examples of single-cell simple spike responses to mossy fiber stimulation. Right: quantification of simple spike responses to all recorded cells. Significance of differences are indicated by the color and corresponding p-value map.
- Cspk responses to mossy fiber stimulation. Left: PSTH of the population of recorded cells with Cspks binned at 250 ms. A single trace showing a Cspk after stimulation is shown above. Right: Quantification of Cspk probability in the stimulated and non-stimulated epochs for each cell.

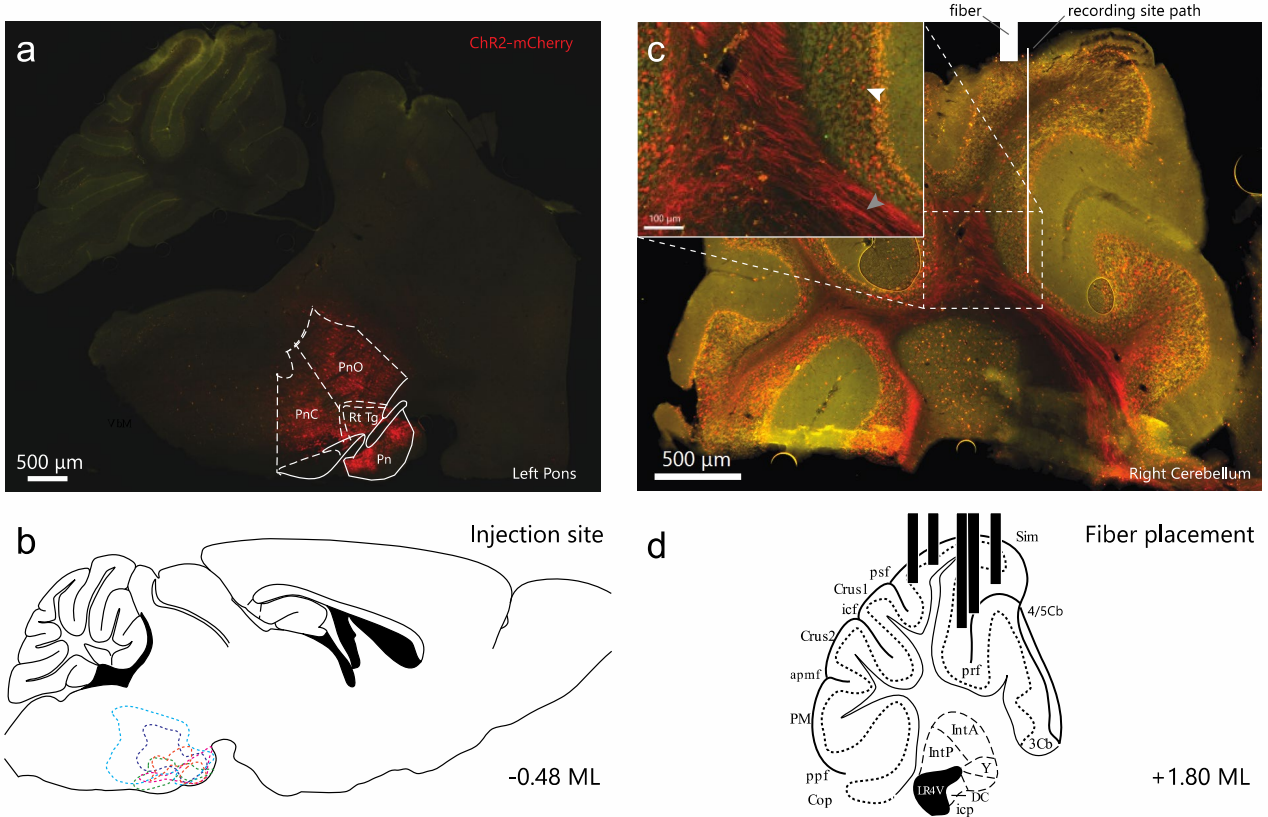

**Figure S5.** Opsin expression for mice in behavioral experiments.

- Histological section showing ChR2-mCherry expression at the injection site in the left pontine nuclei (Pn: pontine nuclei; RtTg: reticulotegmental nuclei; PnO: pontine reticular nuclei, oral part; PnC: pontine reticular nuclei, caudal part).
- Contours of ChR2 expression in the pontine nuclei for mice used in behavioral experiments.
- Right cerebellum of the animal shown in **a**. Mossy fiber axons (grey arrow) and boutons (white arrow) can be seen expressing ChR2 in the cerebellar cortex. The approximate location of the optical fiber and recording site path are shown in white.
- Location of fiber placement in a representative section for animals used in behavioral experiments.



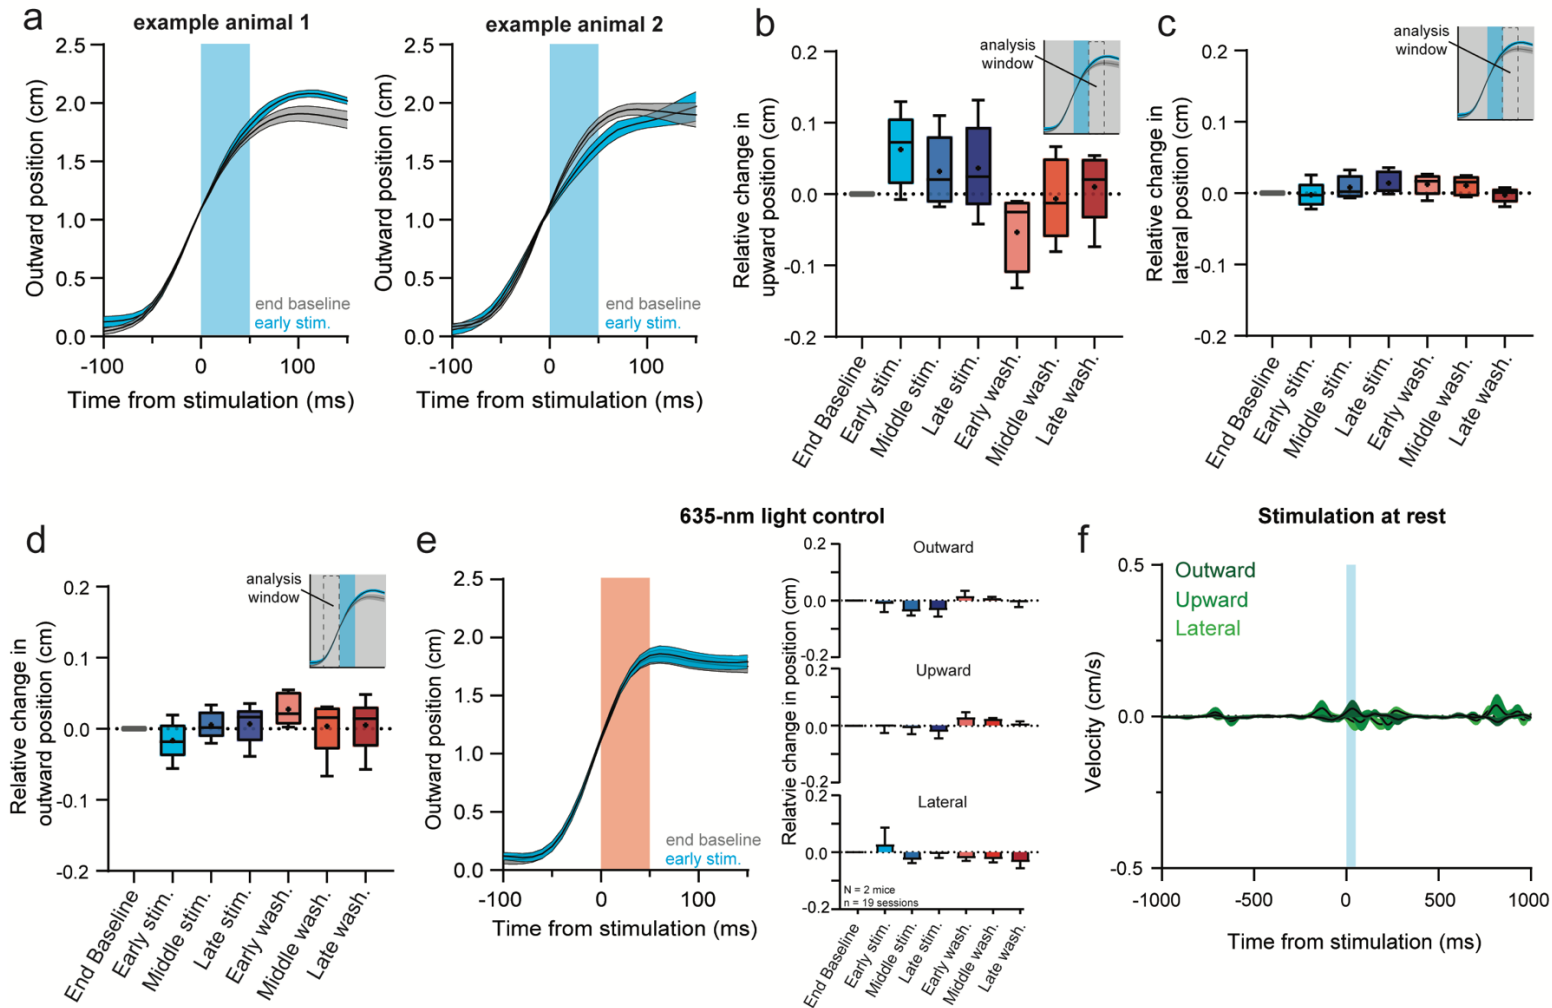

**Figure S6.** Fixed-position stimulation supplemental data

- Two example mice with differing effects of stimulation on early reaches in the stimulation block. To account for diverging effects we define the direction of deviation with stimulation as positive and the opposing direction as negative.
- Summary of the relative change in upward position for the same data shown in Fig. 3e. Relative change in upward position was assessed in the 50-ms window following the end of stimulation.
- Summary of the relative change in lateral position for the same data shown in Fig. 3e.
- Summary of the relative change in outward position for in the 50-ms window before stimulation.
- Stimulating with 635-nm light did not cause deviations in position or adaptation profiles.
- Stimulating while the mouse was awake with its hand at rest on the bar produced virtually no movement.

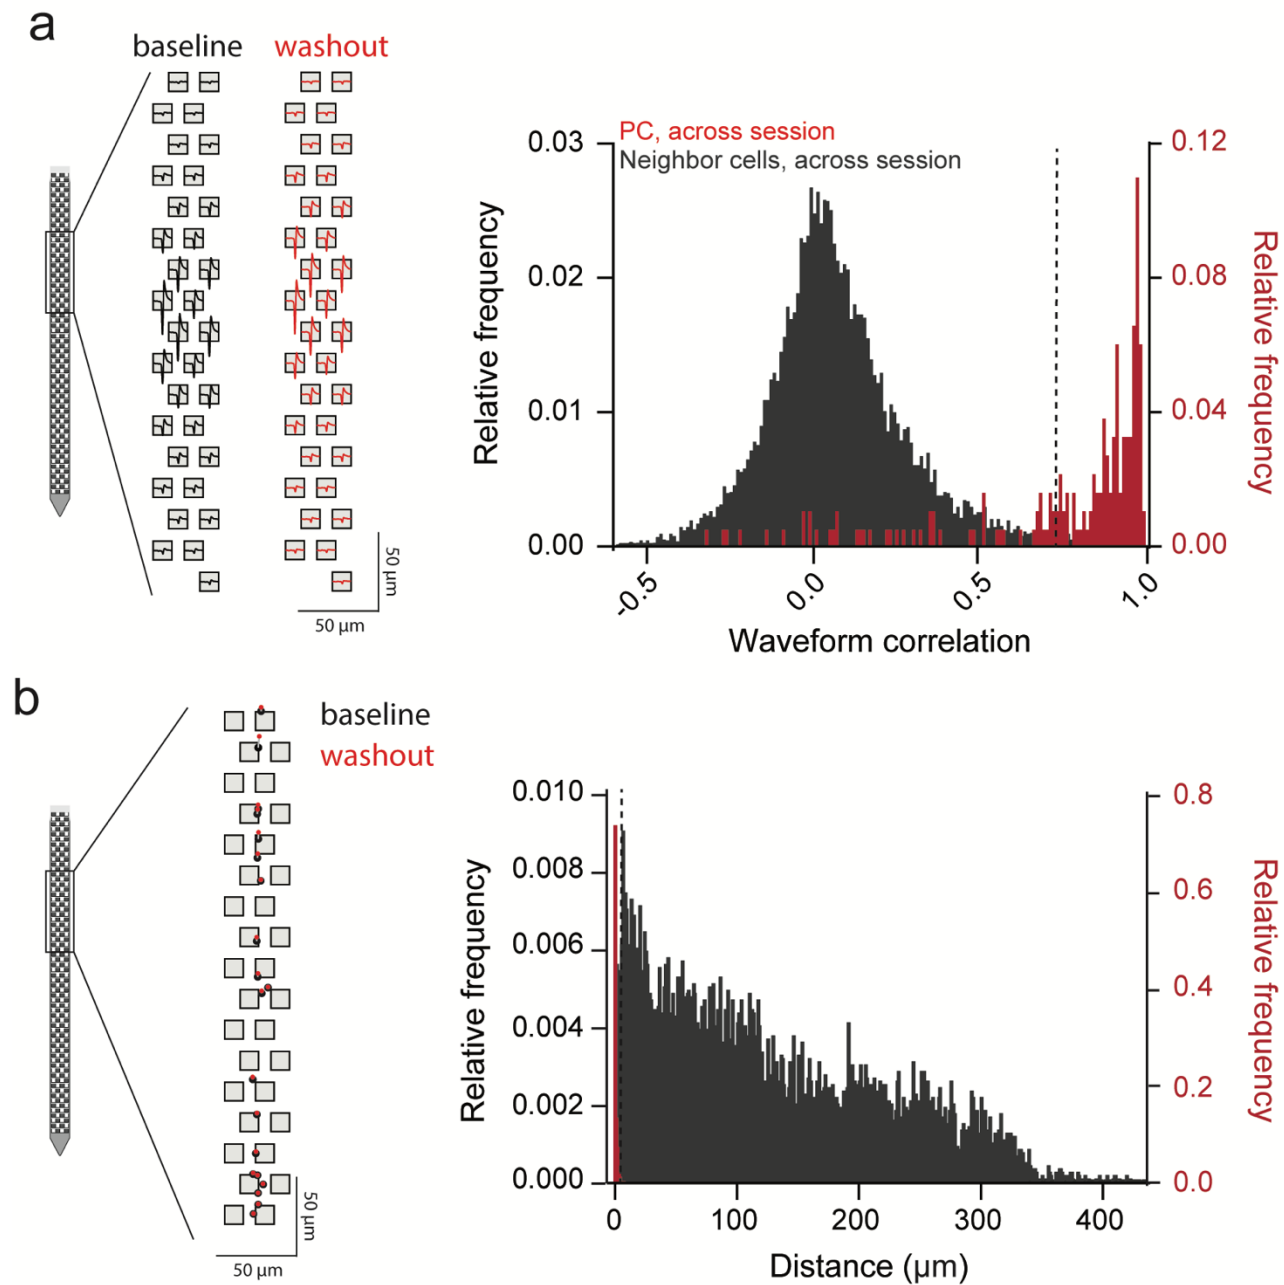

**Figure S7.** Assessing unit stability across recording sessions.

- a. Left: Waveforms templates detected on each Neuropixel electrode for a cell during baseline and during washout. Right: Histogram of waveform correlation of PCs across sessions (red) and of mismatched neighboring cells, across the session (shuffled control, grey). PCs with an across-session waveform correlation that fell below the 99<sup>th</sup> percentile of the shuffled control (dashed line) were excluded from further analysis.
- b. Left: Unit displacement for cells across a session. Baseline unit position is shown in grey and washout position is shown in red. Right: Histogram of unit displacement of PCs across sessions (red) and of mismatched neighboring cells, across the session (shuffled control, grey). PCs with an across-session displacement that fell below the 1<sup>st</sup> percentile of the shuffled control (dashed line) were excluded from further analysis.

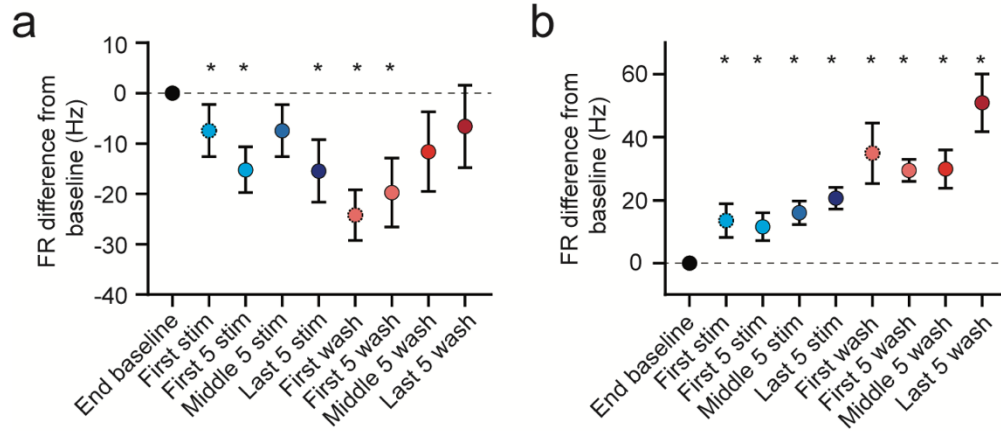

**Figure S8.** Firing rate profiles of aftereffect cells in stimulation and washout.

- Cells with a decreased firing rate in washout compared to baseline showed a progressive decline in the stimulation block and recovery during washout (same as in Fig. 4e).
- Cells with an increased firing rate through stimulation and washout.

645 **References:**

- 646
- 647 1. Holmes, G. The symptoms of acute cerebellar injuries due to gunshot injuries. *Brain* **40**, 461–535
- 648 (1917).
- 649 2. Becker, M. I. & Person, A. L. Cerebellar Control of Reach Kinematics for Endpoint Precision.
- 650 *Neuron* **103**, 335–348.e5 (2019).
- 651 3. Lang, C. E. & Bastian, A. J. Cerebellar subjects show impaired adaptation of anticipatory EMG
- 652 during catching. *J. Neurophysiol.* **82**, 2108–2119 (1999).
- 653 4. Baizer, J. S., Kralj-Hans, I. & Glickstein, M. Cerebellar lesions and prism adaptation in macaque
- 654 monkeys. *J. Neurophysiol.* **81**, 1960–1965 (1999).
- 655 5. Tseng, Y. W., Diedrichsen, J., Krakauer, J. W., Shadmehr, R. & Bastian, A. J. Sensory prediction
- 656 errors drive cerebellum-dependent adaptation of reaching. *J. Neurophysiol.* **98**, 54–62 (2007).
- 657 6. Morton, S. M. & Bastian, A. J. Cerebellar contributions to locomotor adaptations during splitbelt
- 658 treadmill walking. *J. Neurosci.* **26**, 9107–9116 (2006).
- 659 7. Smith, M. A. & Shadmehr, R. Intact ability to learn internal models of arm dynamics in
- 660 Huntington’s disease but not cerebellar degeneration. *J. Neurophysiol.* **93**, 2809–2821 (2005).
- 661 8. Miall, R. & Wolpert, D. Forward Models for physiological motor control. *Neural Networks* **9**, 1265–
- 662 1279 (1996).
- 663 9. Kawato, M. & Gomi, H. The cerebellum and VOR / OKR learning models. *Trends Neurosci.* **15**,
- 664 445–453 (1992).
- 665 10. Ohyama, T., Noes, W. L., Murphy, M. & Mauk, M. D. What the cerebellum computes. *Trends*
- 666 *Neurosci.* **26**, 222–227 (2003).
- 667 11. Shadmehr, R. & Krakauer, J. W. A computational neuroanatomy for motor control. *Exp. Brain*
- 668 *Res.* **185**, 359–381 (2008).
- 669 12. Shadmehr, R., Smith, M. A. & Krakauer, J. W. Error correction, sensory prediction, and
- 670 adaptation in motor control. *Annu. Rev. Neurosci.* **33**, 89–108 (2010).
- 671 13. Lavond, D. G., Knowlton, B. J., Steinmetz, J. E. & Thompson, R. F. Classical Conditioning of the
- 672 Rabbit Eyelid Response With a Mossy-Fiber Stimulation CS: II. Lateral Reticular Nucleus
- 673 Stimulation. *Behav. Neurosci.* **101**, 676–682 (1987).
- 674 14. Mauk, M. D., Steinmetz, J. E. & Thompson, R. F. Classical conditioning using stimulation of the
- 675 inferior olive as the unconditioned stimulus. *Proc. Natl. Acad. Sci. U. S. A.* **83**, 5349–5353
- 676 (1986).
- 677 15. Coesmans, M., Weber, J. T., De Zeeuw, C. I. & Hansel, C. Bidirectional parallel fiber plasticity in
- 678 the cerebellum under climbing fiber control. *Neuron* **44**, 691–700 (2004).
- 679 16. Ito, M. & Kano, M. Long-lasting depression of parallel fiber-Purkinje cell transmission induced by
- 680 conjunctive stimulation of parallel fibers and climbing fibers in the cerebellar cortex. *Neurosci.*
- 681 *Lett.* **33**, 253–258 (1982).
- 682 17. Lee, K. H. *et al.* Circuit mechanisms underlying motor memory formation in the cerebellum.
- 683 *Neuron* **86**, 529–540 (2015).
- 684 18. Ekerot, C. F., Garwicz, M. & Schouenborg, J. Topography and nociceptive receptive fields of
- 685 climbing fibres projecting to the cerebellar anterior lobe in the cat. *J. Physiol.* **441**, 257–274
- 686 (1991).
- 687 19. Bloedel, J. R. & Bracha, V. On the cerebellum, cutaneomuscular reflexes, movement control and
- 688 the elusive engrams of memory. *Behav. Brain Res.* **68**, 1–44 (1995).
- 689 20. Ito, M. Cerebellar control of the vestibulo-ocular reflex--around the flocculus hypothesis. *Annu.*
- 690 *Rev. Neurosci.* **5**, 275–297 (1982).
- 691 21. Blazquez, P. M., Hirata, Y., Heiney, S. A., Green, A. M. & Highstein, S. M. Cerebellar Signatures
- 692 of Vestibulo-Ocular Reflex Motor Learning. *J. Neurosci.* **23**, 9742–9751 (2003).
- 693 22. Rowan, M. J. M. *et al.* Graded Control of Climbing-Fiber-Mediated Plasticity and Learning by

- 694 Inhibition in the Cerebellum. *Neuron* 1–17 (2018). doi:10.1016/j.neuron.2018.07.024
- 695 23. Yang, Y. & Lisberger, S. G. Interaction of plasticity and circuit organization during the acquisition
- 696 of cerebellum-dependent motor learning. *Elife* **2013**, 1–19 (2013).
- 697 24. Herzfeld, D. J., Kojima, Y., Soetedjo, R. & Shadmehr, R. Encoding of error and learning to
- 698 correct that error by the Purkinje cells of the cerebellum. *Nat. Neurosci.* **21**, (2018).
- 699 25. Raymond, J. L., Lisberger, S. G. & Mauk, M. D. The cerebellum: A neuronal learning machine?
- 700 *Science* (80-. ). **272**, 1126–1131 (1996).
- 701 26. Gandolfo, F., Li, C. S. R., Benda, B. J., Padoa Schioppa, C. & Bizzi, E. Cortical correlates of
- 702 learning in monkeys adapting to a new dynamical environment. *Proc. Natl. Acad. Sci. U. S. A.*
- 703 **97**, 2259–2263 (2000).
- 704 27. Li, C. S. R., Padoa-Schioppa, C. & Bizzi, E. Neuronal correlates of motor performance and motor
- 705 learning in the primary motor cortex of monkeys adapting to an external force field. *Neuron* **30**,
- 706 593–607 (2001).
- 707 28. Mathis, M. W., Mathis, A. & Uchida, N. Somatosensory Cortex Plays an Essential Role in
- 708 Forelimb Motor Adaptation in Mice. *Neuron* **93**, 1493-1503.e6 (2017).
- 709 29. Proville, R. D. *et al.* Cerebellum involvement in cortical sensorimotor circuits for the control of
- 710 voluntary movements. *Nat. Neurosci.* **17**, 1233–1239 (2014).
- 711 30. Hewitt, A. L., Popa, L. S. & Ebner, T. J. Changes in Purkinje Cell Simple Spike Encoding of
- 712 Reach Kinematics during Adaption to a Mechanical Perturbation. *J. Neurosci.* **35**, 1106–1124
- 713 (2015).
- 714 31. Low, A. Y. T. *et al.* Precision of Discrete and Rhythmic Forelimb Movements Requires a Distinct
- 715 Neuronal Subpopulation in the Interposed Anterior Nucleus. *Cell Rep.* **22**, 2322–2333 (2018).
- 716 32. Guo, J.-Z. *et al.* Disrupting cortico-cerebellar communication impairs dexterity. *Elife* **10**, 1–31
- 717 (2021).
- 718 33. Becker, M. I., Calame, D. J., Wrobel, J. & Person, A. L. Online control of reach accuracy in mice.
- 719 *J. Neurophysiol.* **124**, 1637–1655 (2020).
- 720 34. Tibshirani, R. Regression Shrinkage and Selection via the Lasso. *J. R. Stat. Soc.* **58**, 267–288
- 721 (1996).
- 722 35. Popa, L. S., Streng, M. L. & Ebner, T. J. Long-Term Predictive and Feedback Encoding of Motor
- 723 Signals in the Simple Spike Discharge of Purkinje Cells. **4**, (2017).
- 724 36. Streng, M. L., Popa, L. S. & Ebner, T. J. Climbing Fibers Control Purkinje Cell Representations of
- 725 Behavior. *J. Neurosci.* **37**, 1997–2009 (2017).
- 726 37. Coltz, J. D., Johnson, M. T. & Ebner, T. J. Cerebellar Purkinje cell simple spike discharge
- 727 encodes movement velocity in primates during visuomotor arm tracking. *J. Neurosci.* **19**, 1782–
- 728 803 (1999).
- 729 38. Hewitt, A. L., Popa, L. S., Pasalar, S., Hendrix, C. M. & Ebner, T. J. Representation of limb
- 730 kinematics in Purkinje cell simple spike discharge is conserved across multiple tasks. *J.*
- 731 *Neurophysiol.* **106**, 2232–2247 (2011).
- 732 39. Roitman, A. V., Pasalar, S., Johnson, M. T. V. & Ebner, T. J. Position, direction of movement,
- 733 and speed tuning of cerebellar Purkinje cells during circular manual tracking in monkey. *J.*
- 734 *Neurosci.* **25**, 9244–9257 (2005).
- 735 40. Musall, S., Kaufman, M. T., Juavinett, A. L., Gluf, S. & Churchland, A. K. Single-trial neural
- 736 dynamics are dominated by richly varied movements. *Nat. Neurosci.* **22**, 1677–1686 (2019).
- 737 41. Herzfeld, D. J., Kojima, Y., Soetedjo, R. & Shadmehr, R. Encoding of action by the Purkinje cells
- 738 of the cerebellum. *Nature* **526**, 439–441 (2015).
- 739 42. Brown, S. T. & Raman, I. M. Sensorimotor Integration and Amplification of Reflexive Whisking by
- 740 Well-Timed Spiking in the Cerebellar Corticonuclear Circuit. *Neuron* 1–12 (2018).
- 741 doi:10.1016/j.neuron.2018.06.028
- 742 43. Person, A. L. & Raman, I. M. Purkinje neuron synchrony elicits time-locked spiking in the
- 743 cerebellar nuclei. *Nature* **481**, 502–505 (2012).
- 744 44. Thier, P., Dicke, P. W., Haas, R. & Barash, S. Encoding of movement time by populations of



- 745 cerebellar Purkinje cells. *Nature* **405**, 72–76 (2000).
- 746 45. Medina, J. F. & Lisberger, S. G. Links from complex spikes to local plasticity and motor learning  
747 in the cerebellum of awake-behaving monkeys. *Nat. Neurosci.* **11**, 1185–1192 (2008).
- 748 46. Kimpo, R. R., Rinaldi, J. M., Kim, C. K., Payne, H. L. & Raymond, J. L. Gating of neural error  
749 signals during motor learning. *Elife* **3**, 1–23 (2014).
- 750 47. Avraham, G., Taylor, J. A., Breska, A., Ivry, R. B. & McDougale, S. D. Contextual effects in motor  
751 adaptation adhere to associative learning rules. *bioRxiv* 2020.09.14.297143 (2021).
- 752 48. Wagner, M. J. *et al.* A neural circuit state change underlying skilled movements. *Cell* 3731–3747  
753 (2021). doi:10.1016/j.cell.2021.06.001
- 754 49. Kitazawa, S., Kimura, T. & Yin, P. B. Cerebellar complex spikes encode both destinations and  
755 errors in arm movements. *Nature* **392**, 494–497 (1998).
- 756 50. Gaffield, M. A. & Christie, J. M. The cerebellum encodes and influences the initiation and  
757 termination of discontinuous movements. *bioRxiv* 1–31 (2021).
- 758 51. Miall, R. C., Keating, J. G., Malkmus, M. & Thach, W. T. Simple spike occurrence of complex  
759 spikes in cerebellar Purkinje cells. *Nat Neurosci* **1**, 13–15 (1998).
- 760 52. Medina, J. F., Nores, W. L. & Mauk, M. D. Inhibition of climbing fibres is a signal for the extinction  
761 of conditioned eyelid responses. *Nature* **416**, 330–333 (2002).
- 762 53. Kim, O. A., Ohmae, S. & Medina, J. F. sufficient to cause extinction of associative motor  
763 learning. *Nat. Neurosci.* **23**, 1550–1554 (2021).
- 764 54. Burroughs, A. *et al.* The dynamic relationship between cerebellar Purkinje cell simple spikes and  
765 the spikelet number of complex spikes. *J. Physiol.* **595**, 283–299 (2017).
- 766 55. Brodal, A. & Jansen, J. The ponto-cerebellar projection in the rabbit and cat. *J. Comp. Neurol.*  
767 **84**, 31–118 (1946).
- 768 56. Brodal, P. & Bjaalie, J. G. Organization of the pontine nuclei. *Neurosci. Res.* **13**, 83–118 (1992).
- 769 57. Leergaard, T. B. *et al.* Three-dimensional topography of corticopontine projections from rat  
770 sensorimotor cortex: Comparisons with corticostriatal projections reveal diverse integrative  
771 organization. *J. Comp. Neurol.* **478**, 306–322 (2004).
- 772 58. Sillitoe, R. V., Fu, Y. H. & Watson, C. *Cerebellum. The Mouse Nervous System* (Elsevier Inc.,  
773 2012). doi:10.1016/B978-0-12-369497-3.10011-1
- 774 59. Huang, C. C. *et al.* Convergence of pontine and proprioceptive streams onto multimodal  
775 cerebellar granule cells. *Elife* **2013**, 1–17 (2013).
- 776 60. Kim, J. & Augustine, G. J. Molecular Layer Interneurons: Key Elements of Cerebellar Network  
777 Computation and Behavior. *Neuroscience* **462**, 22–35 (2021).
- 778 61. Rasmussen, A., Jirenhed, D. A., Wetmore, D. Z. & Hesslow, G. Changes in complex spike  
779 activity during classical conditioning. *Front. Neural Circuits* **8**, 1–13 (2014).
- 780 62. Herzfeld, D. J., Hall, N. J., Tringides, M. & Lisberger, S. G. Principles of operation of a cerebellar  
781 learning circuit. *Elife* **9**, 1–30 (2020).
- 782 63. Mauk, M. D. & Buonomano, D. V. The neural basis of temporal processing. *Annu. Rev. Neurosci.*  
783 **27**, 307–340 (2004).
- 784 64. Shimansky, Y., Wang, J. J., Bauer, R. A., Bracha, V. & Bloedel, J. R. On-line compensation for  
785 perturbations of a reaching movement is cerebellar dependent: Support for the task dependency  
786 hypothesis. *Exp. Brain Res.* **155**, 156–172 (2004).
- 787 65. Albergaria, C., Silva, N. T., Pritchett, D. L. & Carey, M. R. Locomotor activity modulates  
788 associative learning in mouse cerebellum. *Nat. Neurosci.* **21**, 725–735 (2018).
- 789 66. Donchin, O., Francis, J. T. & Shadmehr, R. Quantifying generalization from trial-by-trial behavior  
790 of adaptive systems that learn with basis functions: Theory and experiments in human motor  
791 control. *J. Neurosci.* **23**, 9032–9045 (2003).
- 792 67. Nashef, A. *et al.* Cerebellar Shaping of Motor Cortical Firing Is Correlated with Timing of Motor  
793 Actions Article Cerebellar Shaping of Motor Cortical Firing Is Correlated with Timing of Motor  
794 Actions. *CellReports* **23**, 1275–1285 (2018).
- 795 68. Shinoda, Y., Kakei, S., Futami, T. & Wannier, T. Thalamocortical organization in the cerebello-



- 796 thalamo-cortical system. *Cereb. Cortex* **3**, 421–429 (1993).
- 797 69. Shinoda, Y., Futami, T. & Kano, M. Input-output organization of the ventrolateral nucleus of the  
798 thalamus. *Stereotact Funct Neurosurg* **60**, 17–31 (1993).
- 799 70. Shinoda, Y., Futami, T. & Kano, M. Synaptic organization of the cerebello-thalamo-cerebral  
800 pathway in the cat. II. Input-output organization of single thalamocortical neurons in the  
801 ventrolateral thalamus. *Neurosci. Res.* **2**, 157–180 (1985).
- 802 71. Hadjiosif, A. M., Krakauer, J. W. & Haith, A. M. Did we get sensorimotor adaptation wrong?  
803 implicit adaptation as direct policy updating rather than forward-model-based learning. *J.*  
804 *Neurosci.* **41**, 2747–2761 (2021).
- 805 72. Lee, K. H. *et al.* Circuit mechanisms underlying motor memory formation in the cerebellum.  
806 *Neuron* **86**, 529–540 (2015).
- 807 73. White, J. J. *et al.* An optimized surgical approach for obtaining stable extracellular single-unit  
808 recordings from the cerebellum of head-fixed behaving mice. *J. Neurosci. Methods* **262**, 21–31  
809 (2016).
- 810 74. TestArduino. (2015). Available at: <https://github.com/cortex-lab/phy>.
- 811 75. Yu, B., Gabriel, D., Noble, L. & An, K. N. Estimate of the optimum cut-off frequency for the  
812 Butterworth low-pass digital filter. *J. Appl. Biomech.* **15**, 318–329 (1999).
- 813 76. Sedaghat-Nejad, E. *et al.* P-sort: An open-source software for cerebellar neurophysiology. *J.*  
814 *Neurophysiol.* **126**, 1055–1075 (2021).
- 815 77. Pachitariu, M., Steinmetz, N., Kadir, S., Carandini, M. & Kenneth D., H. Kilosort: realtime spike-  
816 sorting for extracellular electrophysiology with hundreds of channels. *bioRxiv* 061481 (2016).  
817 doi:10.1101/061481
- 818 78. Hensbroek, R. A. *et al.* Identifying Purkinje cells using only their spontaneous simple spike  
819 activity. *J. Neurosci. Methods* **232**, 173–180 (2014).
- 820 79. Schoonover, C. E., Ohashi, S. N., Axel, R. & Fink, A. J. P. Representational drift in primary  
821 olfactory cortex. *Nature* **594**, 541–546 (2021).
- 822 80. Kennedy, A. *et al.* A temporal basis for predicting the sensory consequences of motor  
823 commands in an electric fish. *Nat. Neurosci.* **17**, 416–422 (2014).
- 824 81. Lanore, F., Cayco-Gajic, N. A., Gurnani, H., Coyle, D. & Silver, R. A. Cerebellar granule cell  
825 axons support high-dimensional representations. *Nat. Neurosci.* **24**, 1142–1150 (2021).
- 826 82. Wagner, M. J. *et al.* Shared cortex-cerebellum dynamics in the execution and learning of a motor  
827 task. *Cell* **177**, 669–682 (2019).
- 828
